# Supplementary material for: A Simple and Efficient Method for the Partial Synthesis of Pure (3R,3’S)-Astaxanthin from (3R,3’R,6’R)-Lutein and Lutein Esters via (3R,3’S)-Zeaxanthin and Theoretical Study of Their Formation Mechanisms
Source: PubMed Central journal article supplement (PMC6480186; doi:10.3390/molecules24071386), 2019-04-09
Supplement: molecules-24-01386-s001.pdf [file molecules-24-01386-s001.pdf]

## Supplementary materials

# A Simple and Efficient Method for the Partial Synthesis of Pure (3*R*,3'*S*)-Astaxanthin from (3*R*,3'*R*,6'*R*)-Lutein and Lutein Esters via (3*R*,3'*S*)-Zeaxanthin and Theoretical Study of their Formation Mechanisms

Eloy Rodríguez-deLeón <sup>1</sup>, J. Oscar. C. Jiménez-Halla <sup>2\*</sup>, José E. Báez <sup>2</sup> and M. Moustapha Bah <sup>1,\*</sup>

<sup>1</sup> Posgrado en Ciencias Químico Biológicas, Faculty of Chemistry, Autonomous University of Querétaro, 76010 Querétaro, Mexico; eloy.q22@gmail.com

<sup>2</sup> Department of Chemistry, Division of Natural and Exact Sciences, University of Guanajuato, 36050 Guanajuato, Mexico; jebaez14@yahoo.com.mx

\* Correspondence: jjimenez@ugto.mx (J.O.C.J.-H.); moubah@uaq.mx (M.M.B); Tel.: +52-473-732-0006 (ext. 1433) (J.O.C.J.-H.); +52-442-192-1200 (ext. 5536) (M.M.B)

## Contents

|                                                                                |    |
|--------------------------------------------------------------------------------|----|
| HPLC Analysis .....                                                            | 1  |
| Implementation of the reaction conditions .....                                | 4  |
| <sup>1</sup> H and <sup>13</sup> C NMR spectra.....                            | 5  |
| Calculated reaction mechanisms.....                                            | 9  |
| Tables of optimized Cartesian coordinates of the isomerization reaction .....  | 11 |
| Oxidation reaction mechanism enthalpy and free energy values (Scheme S1) ..... | 22 |
| Tables of optimized Cartesian coordinates of the isomerization reaction .....  | 23 |

## HPLC Analysis

**Table S1.** HPLC analytical conditions: Column: C<sub>30</sub>, 5µm, 140Å, 250 x 4.6 mm; flow rate: 0.7 mL/min; detection at λ = 474 nm; injection volume: 10 µL, run time: 35 minutes; mobile phase: gradient of MeOH–methyl *ter*-butyl ether (MTBE)–H<sub>2</sub>O as follow:

| Time (minutes) | MeOH (%) | MTBE (%) | H <sub>2</sub> O (%) |
|----------------|----------|----------|----------------------|
| 0              | 81       | 15       | 4                    |
| 15             | 66       | 30       | 4                    |
| 23             | 16       | 80       | 4                    |
| 27             | 16       | 80       | 4                    |
| 27.1           | 81       | 15       | 4                    |
| 35             | 81       | 15       | 4                    |

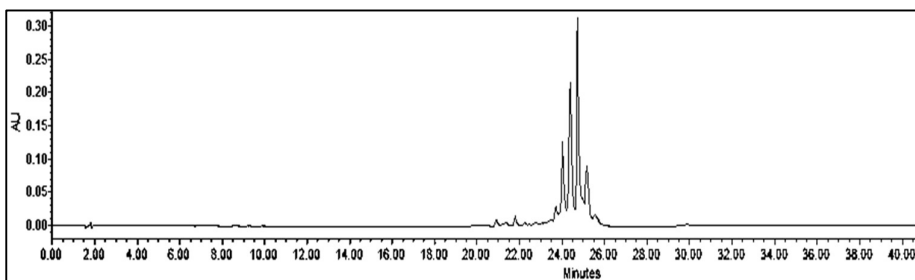

Figure S1. Chromatogram of the lutein esters extracted from the marigold oleoresin.

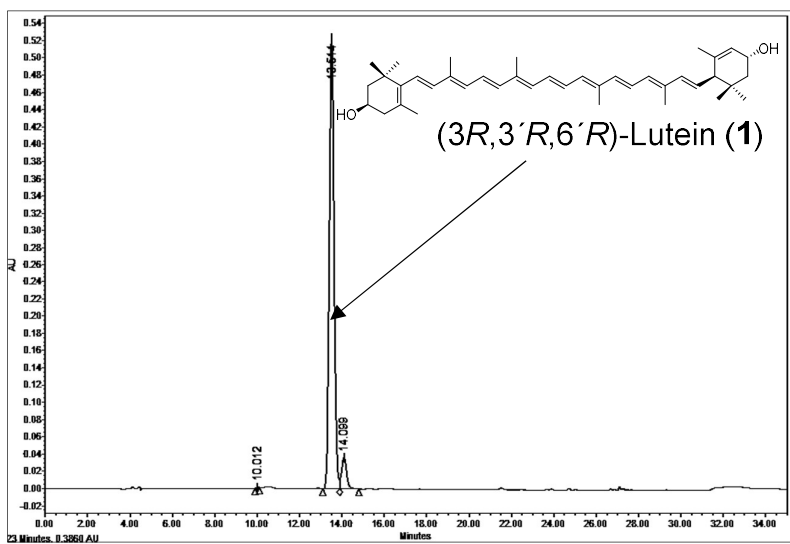

Figure S2. Chromatogram of lutein obtained from KOH-hydrolyzed lutein esters.

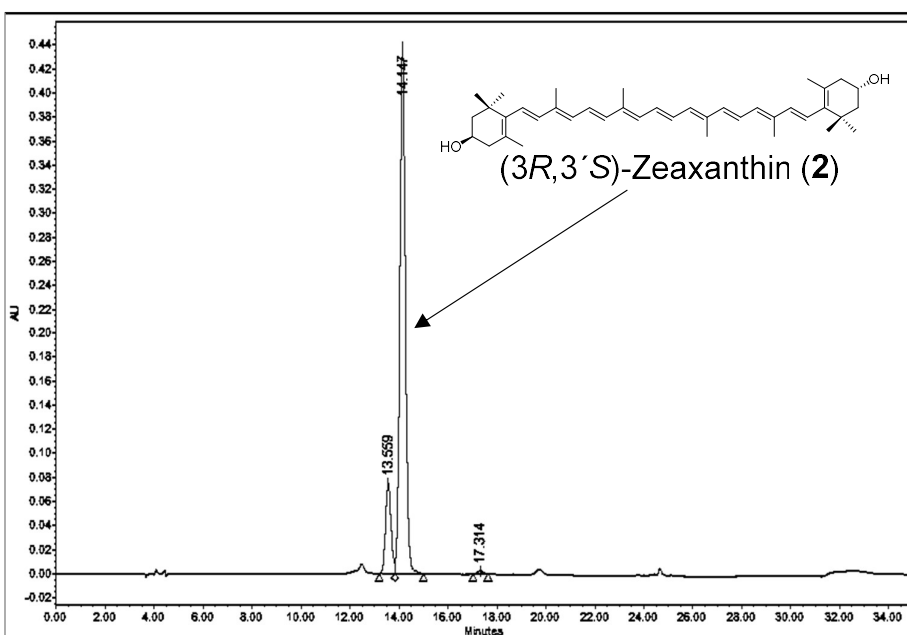

Figure S3. Chromatogram of zeaxanthin obtained from 1.

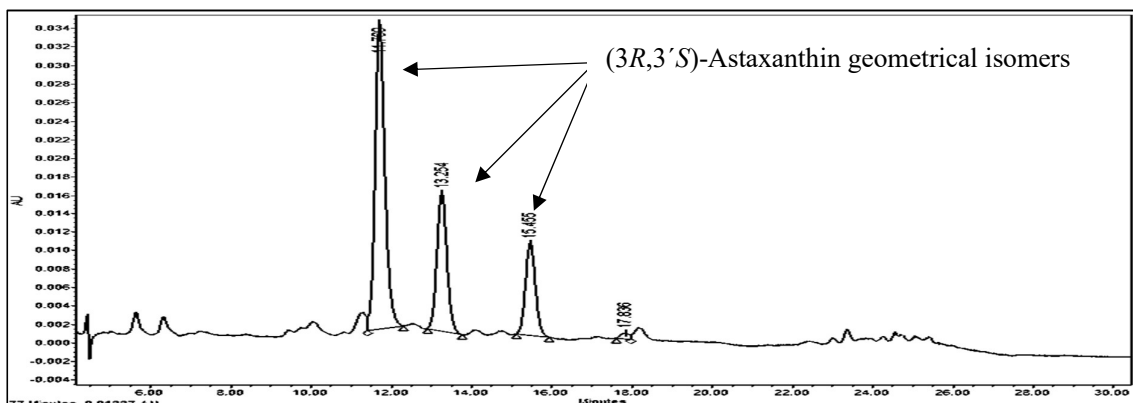

**Figure S4.** Chromatogram of the (3*R*,3'*S*)-astaxanthin obtained during the partial synthesis. The 3 peaks emerge as a consequence of the inherent *cis-trans* isomerization.

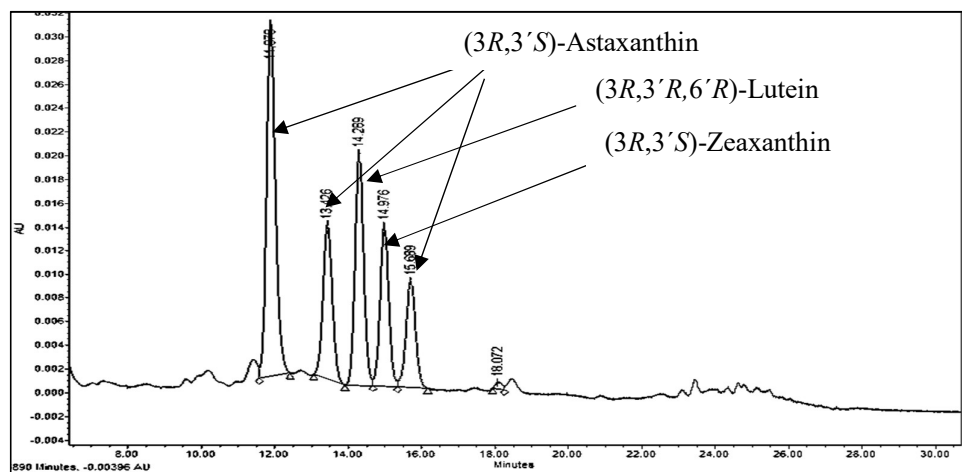

**Figure S5.** HPLC coelution of the obtained lutein, zeaxanthin and astaxanthin.

**Table S2.** Experimental UV  $\lambda_{\max}$  of the carotenoids.

| Compound      | $\lambda_{\max}$ (nm) |
|---------------|-----------------------|
| Lutein        | 446 & 474             |
| Lutein esters | 446 & 474             |
| Zeaxanthin    | 450 & 478             |
| Astaxanthin   | 474                   |

### Implementation of the reaction conditions

**Table S3.** Implementation of the reaction conditions for the conversion of 1 to 2.

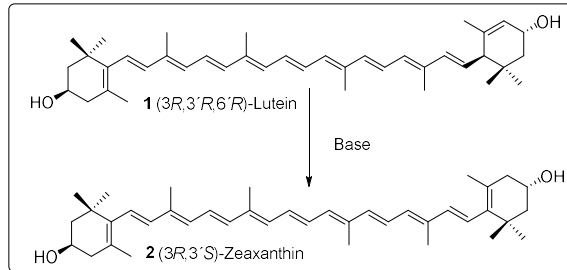

| Entry | Reaction time (Hours) | Solvent        | Temperature (°C) | KOH (equivalents) | Yield (%) |
|-------|-----------------------|----------------|------------------|-------------------|-----------|
| 1     | 8                     | No solvent     | 110              | 10                | 30        |
| 2     | 10                    | DMSO           | 110              | 10                | 75        |
| 3     | 12                    | Hexanes        | Reflux           | 16                | nr        |
| 4     | 14                    | Toluene        | Reflux           | 12                | nr        |
| 5     | 14                    | <i>n</i> -BuOH | 115              | 10                | 92        |
| 6     | 16                    | <i>n</i> -BuOH | 90               | 10                | 50        |
| 7     | 24                    | <i>n</i> -BuOH | rt               | 10                | nr        |
| 8     | 12                    | <i>n</i> -BuOH | 115              | 12                | 92        |

nr= no reaction

**Table S4.** Implementation of the reaction conditions for the conversion of 2 to 3.

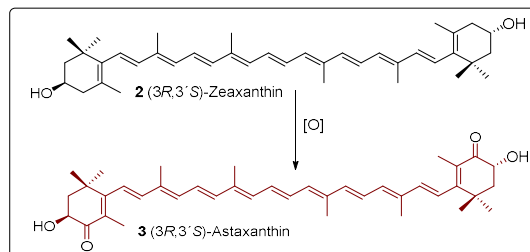

| Entry | I <sub>2</sub> % mol | Solvent                         | Oxidant mixture Equivalents* | Reaction Time (Hours) | Yield (%) |
|-------|----------------------|---------------------------------|------------------------------|-----------------------|-----------|
| 1     | 20                   | CH <sub>2</sub> Cl <sub>2</sub> | 2:1                          | 4                     | 20        |
| 2     | 10                   | CH <sub>2</sub> Cl <sub>2</sub> | 1.5:1                        | 4                     | 10        |
| 3     | 10                   | CH <sub>2</sub> Cl <sub>2</sub> | 2:1                          | 2                     | 64        |
| 4     | 5                    | CH <sub>2</sub> Cl <sub>2</sub> | 1:1                          | 2.5                   | 5         |
| 5     | 2                    | CH <sub>2</sub> Cl <sub>2</sub> | 4:1                          | 2.5                   | 10        |
| 6     | 10                   | CH <sub>2</sub> Cl <sub>2</sub> | 2:1                          | 4                     | 42        |
| 7     | 10                   | acetone                         | 2:1                          | 6                     | nr        |
| 8     | 10                   | Water                           | 2:1                          | 6                     | nr        |

\*Ratio between NaBrO<sub>3</sub> with Na<sub>2</sub>S<sub>2</sub>O<sub>5</sub>, all reactions at 10 °C, nr= no reaction.

# $^1\text{H}$ and $^{13}\text{C}$ NMR spectra

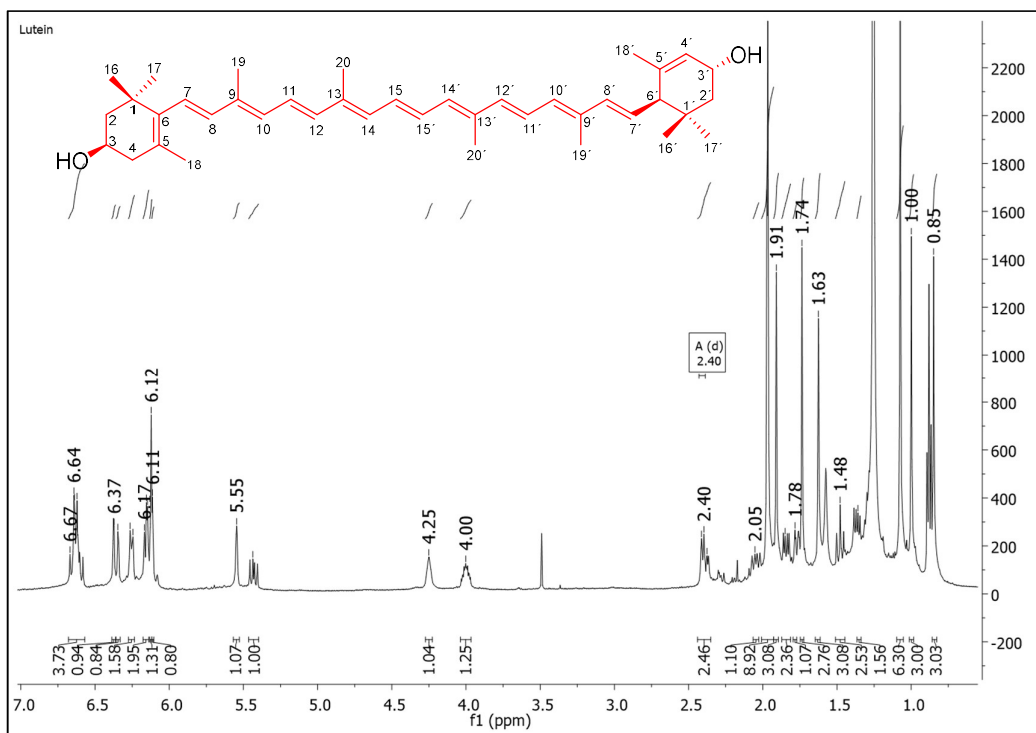

**Figure S6.**  $^1\text{H}$  NMR spectrum of (3*R*,3'*R*,6'*R*)-lutein.

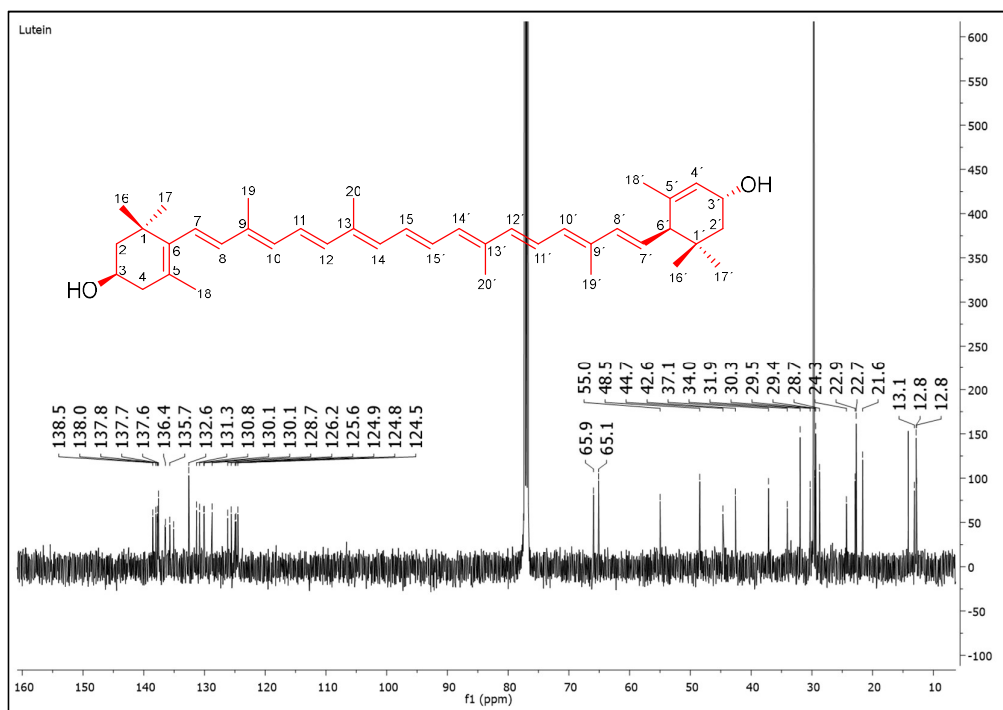

**Figure S7.**  $^{13}\text{C}$  NMR spectrum of (3*R*,3'*R*,6'*R*)-lutein.

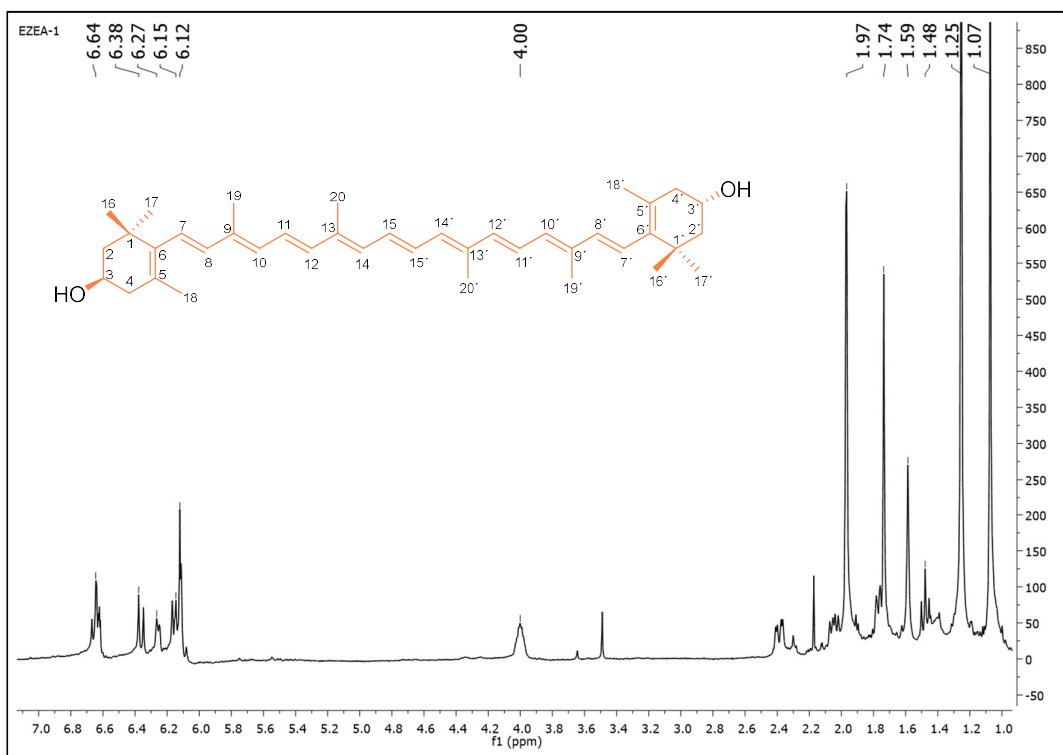

Figure S8.  $^1\text{H}$  NMR spectrum of of  $(3R,3'S)$ -zeaxanthin.

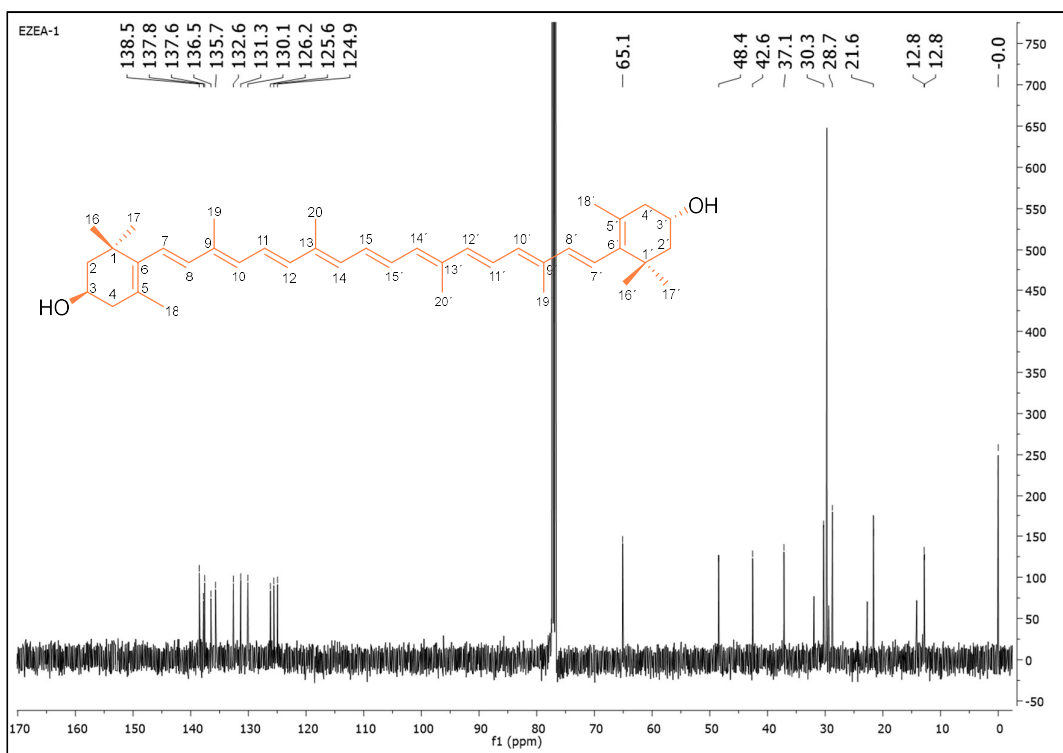

Figure S9.  $^{13}\text{C}$  NMR spectrum of  $(3R,3'S)$ -zeaxanthin.

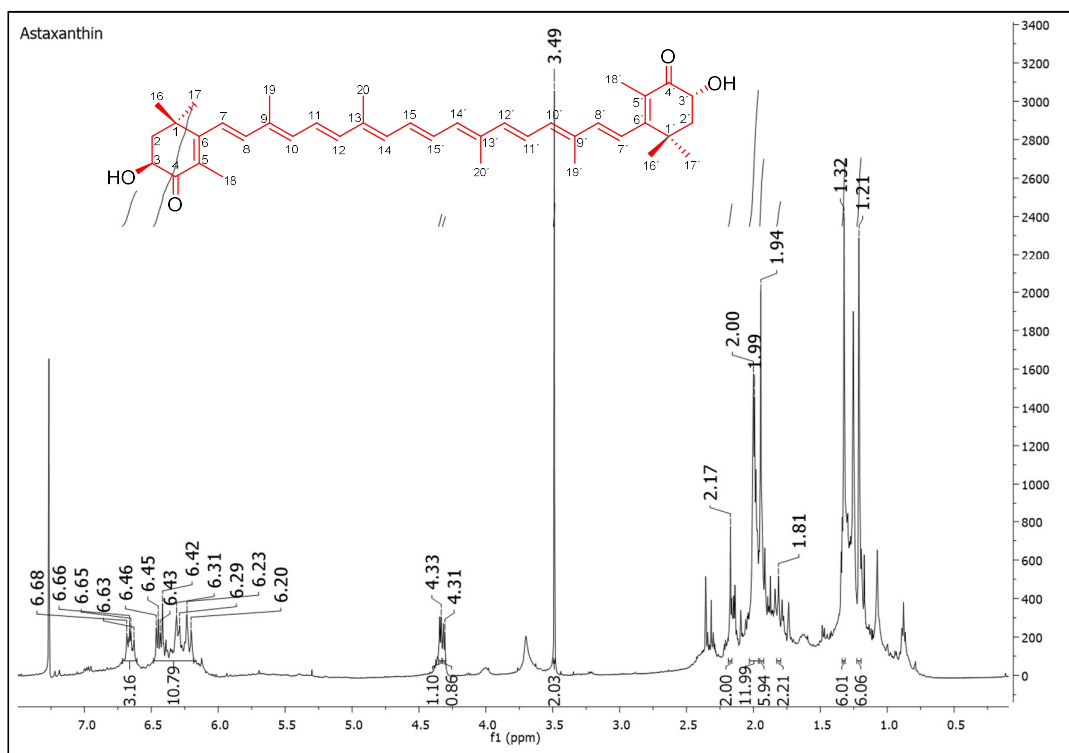

Figure S10. <sup>1</sup>H NMR spectrum of (3*R*,3'*S*)-astaxanthin.

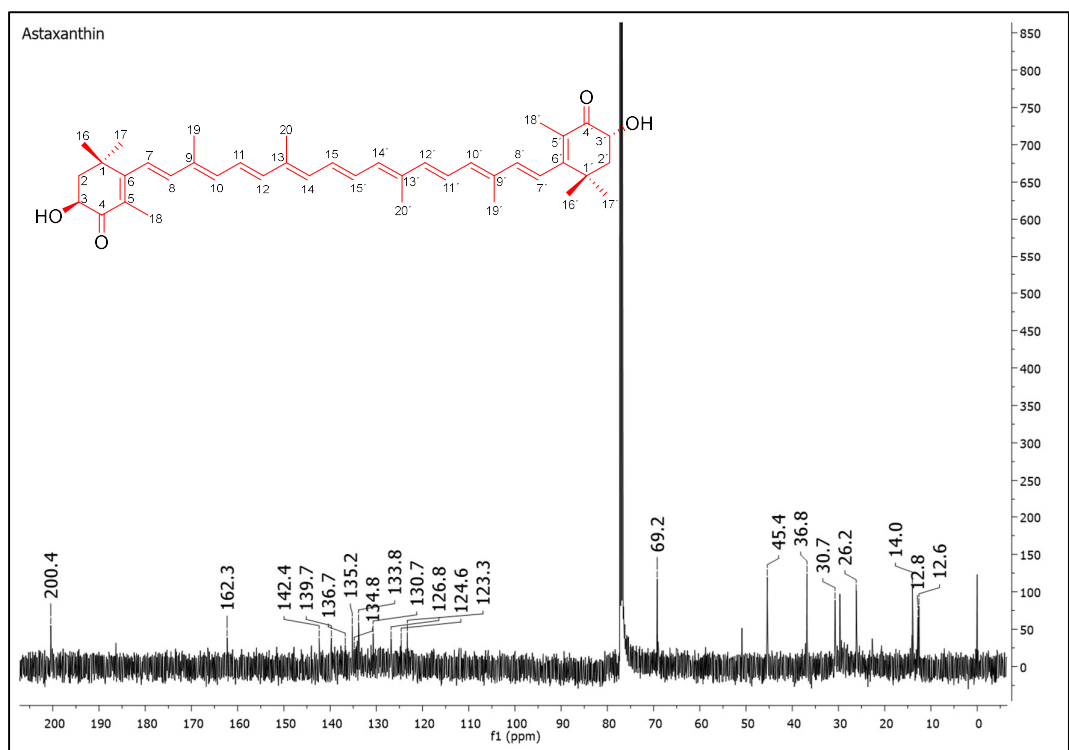

Figure S11. <sup>13</sup>C NMR spectrum of (3*R*,3'*S*)-astaxanthin.

### Calculated reaction mechanisms

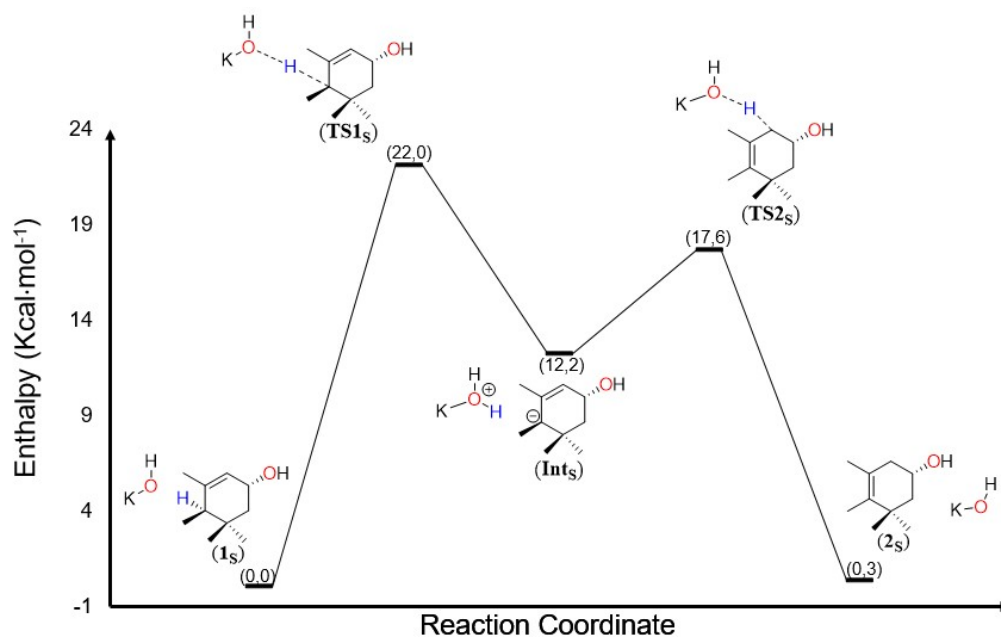

**Figure S12.** Energy profile for the conversion reaction of lutein (1) to zeaxanthin (2) calculated at the (PCM:*n*-butanol) M06-L/6-311+G(2d)//M06-L/6-31G(d) level, using sodium hydroxide as the base. Energy values are expressed as enthalpies in  $\text{kcal}\cdot\text{mol}^{-1}$ .

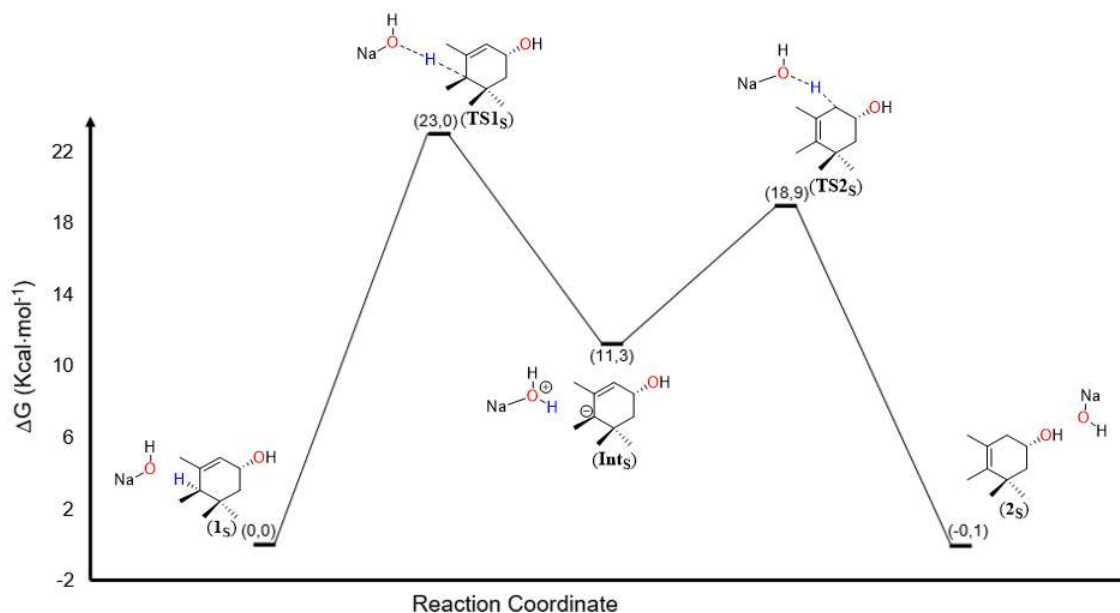

**Figure S13.** Energy profile for the conversion reaction of lutein (1) to zeaxanthin (2) calculated at the (PCM:*n*-butanol) M06-L/6-311+G(2d)//M06-L/6-31G(d) level, using sodium hydroxide as the base. Energy values are expressed as free energies in  $\text{kcal}\cdot\text{mol}^{-1}$ .



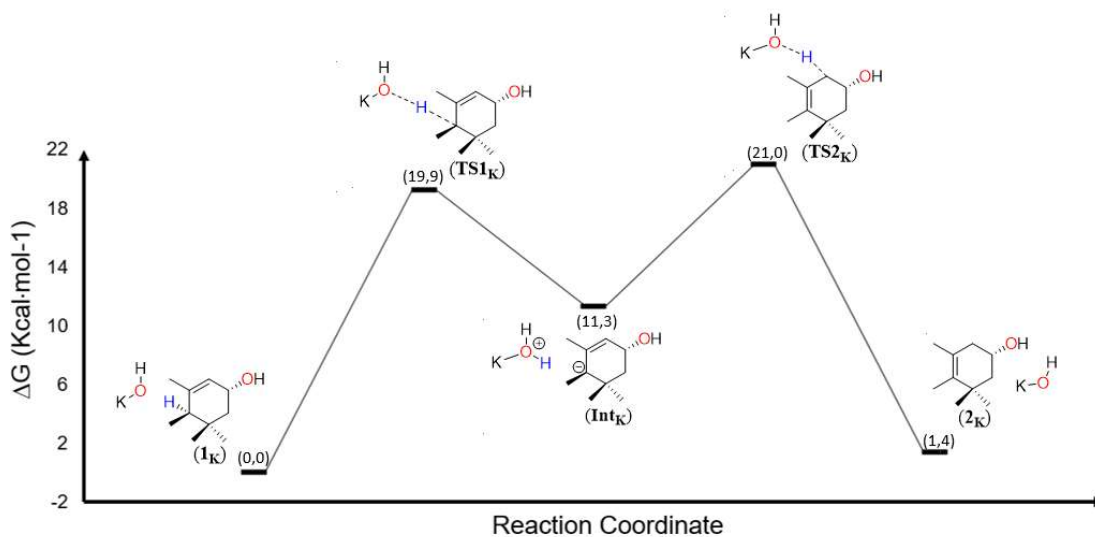

**Figure S14.** Energy profile for the conversion reaction of lutein (**1**) to zeaxanthin (**2**) calculated at the (PCM:*n*-butanol) M06-L/6-311+G(2d)//M06-L/6-31G(d) level, using potassium hydroxide as the base. Energy values are expressed as free energies in  $\text{kcal}\cdot\text{mol}^{-1}$ .

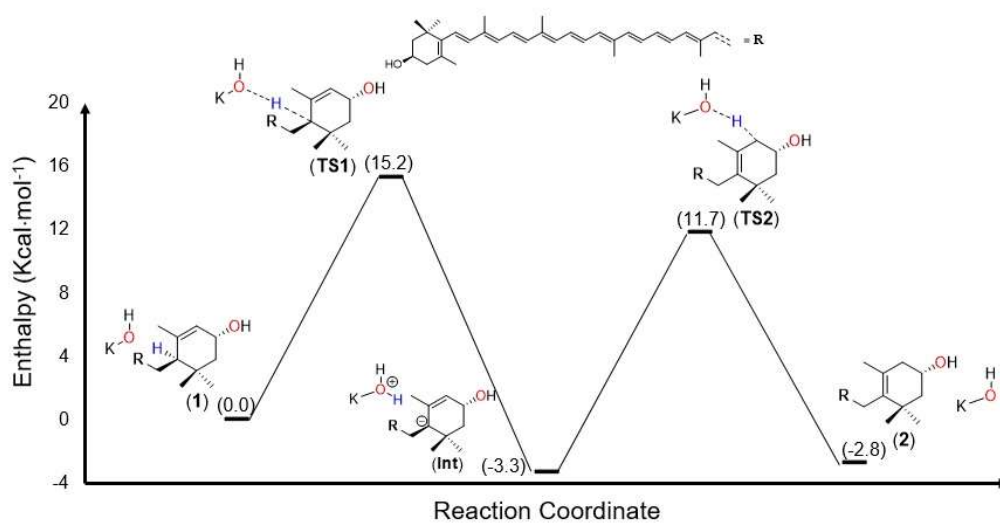

**Figure S15.** Energy profile for the conversion reaction of lutein (**1**) to zeaxanthin (**2**) calculated at the (PCM:*n*-butanol) M06-L/6-311+G(2d)//M06-L/6-31G(d) level, using potassium hydroxide as the base. Energy values are expressed as enthalpies in  $\text{Kcal}\cdot\text{mol}^{-1}$ . **Note:** The real system is shown here for comparison with Figure 2.

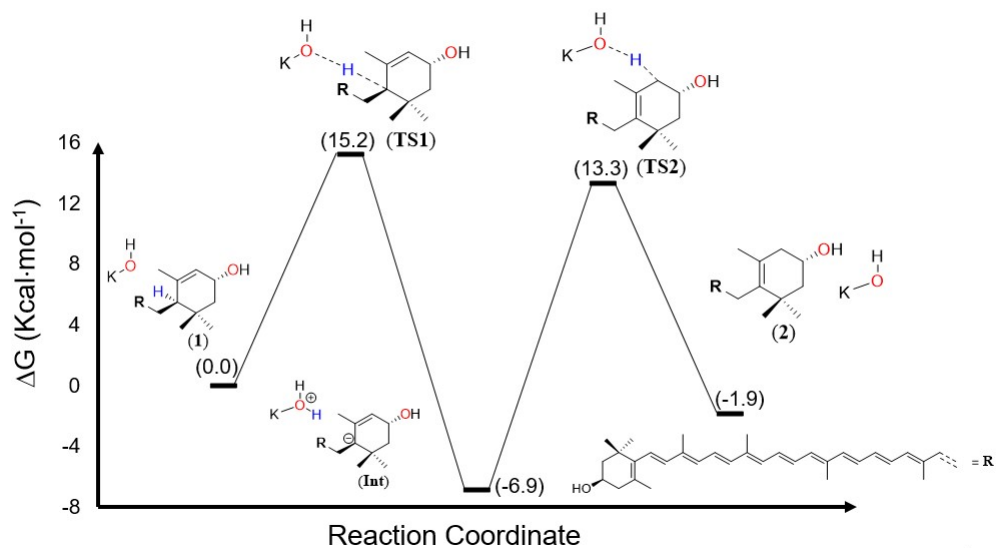

**Figure S16.** Energy profile for the conversion reaction from lutein (**1**) to zeaxanthin (**2**) with potassium hydroxide as base and calculated at the (PCM:*n*-butanol) M06-L/6-311+G(2d)/M06-L/6-31G(d) level. Energy values are expressed as free energies in Kcal·mol<sup>-1</sup>. **Note:** The complete system is shown here for comparison with Figure S1.

**Table S5.** Cartesian coordinates (xyz) for the optimized geometries involved in the conversion reaction mechanism of lutein (**1**) to zeaxanthin (**2**), calculated at the (PCM:1-butanol)M06-L/6-311+G(2d)/M06-L/6-31G(d) level.

- With sodium hydroxide:

| <b>I<sub>s</sub></b>         |              |              |              | <b>TS1<sub>s</sub></b>                       |              |              |              |
|------------------------------|--------------|--------------|--------------|----------------------------------------------|--------------|--------------|--------------|
| E(scf) = -743.286248060 a.u. |              |              |              | E(scf) = -743.257407875 a.u.                 |              |              |              |
|                              |              |              |              | v <sub>min</sub> = -1188.20 cm <sup>-1</sup> |              |              |              |
| C                            | -2.288121000 | 0.018338000  | -0.4511860   | C                                            | -2.01612500  | 0.568590000  | 0.878233000  |
| C                            | -0.9063280   | 0.301398000  | -1.052594000 | C                                            | -0.85050500  | 1.134301000  | 0.046747000  |
| C                            | 0.015676000  | 0.861882000  | 0.060124000  | C                                            | 0.348123000  | 0.162257000  | 0.171328000  |
| C                            | -0.040749000 | 0.020098000  | 1.319115000  | C                                            | -0.05275300  | -1.24722500  | -0.086716000 |
| C                            | -1.076681000 | -0.787234000 | 1.59470400   | C                                            | -1.330865000 | -1.673380000 | -0.00260300  |
| C                            | -2.28306900  | -0.951620000 | 0.729551000  | C                                            | -2.470405000 | -0.82780400  | 0.455634000  |
| H                            | -2.72304400  | 0.975336000  | -0.115291000 | H                                            | -1.68524300  | 0.527794000  | 1.931006000  |
| H                            | -2.96796800  | -0.366484000 | -1.229960000 | H                                            | -2.88597300  | 1.249775000  | 0.851181000  |
| H                            | -1.05667200  | -1.391862000 | 2.508188000  | H                                            | -1.58405600  | -2.695882000 | -0.305312000 |
| C                            | 1.129218000  | 0.161997000  | 2.239446000  | C                                            | 1.000768000  | -2.189619000 | -0.60559200  |
| H                            | 1.055356000  | -0.49652600  | 3.113911000  | H                                            | 0.626275000  | -3.21767800  | -0.697694000 |
| H                            | 2.064280000  | -0.06100400  | 1.698676000  | H                                            | 1.339926000  | -1.861581000 | -1.600994000 |
| H                            | 1.231568000  | 1.198690000  | 2.596167000  | H                                            | 1.901034000  | -2.21795800  | 0.025152000  |
| C                            | -1.04618800  | 1.313497000  | -2.187275000 | C                                            | -0.529727000 | 2.536334000  | 0.56024000   |
| H                            | -1.544294000 | 2.233141000  | -1.85402100  | H                                            | -0.36367300  | 2.555229000  | 1.645205000  |
| H                            | -0.06228300  | 1.597084000  | -2.58689200  | H                                            | 0.368337000  | 2.946712000  | 0.075199000  |
| H                            | -1.635465000 | 0.891232000  | -3.01284000  | H                                            | -1.36274700  | 3.219619000  | 0.343302000  |
| C                            | -0.28075800  | -0.972317000 | -1.625102000 | C                                            | -1.25351900  | 1.270084000  | -1.427229000 |
| H                            | -0.954426000 | -1.44839800  | -2.350678000 | H                                            | -2.172032000 | 1.864808000  | -1.53535800  |
| H                            | 0.660486000  | -0.73436600  | -2.141432000 | H                                            | -0.45310900  | 1.766065000  | -1.992360000 |
| H                            | -0.065103000 | -1.711053000 | -0.84493700  | H                                            | -1.442398000 | 0.293243000  | -1.88551800  |
| C                            | -0.275326000 | 2.292762000  | 0.419892000  | C                                            | 1.237611000  | 0.380187000  | 1.306875000  |
| H                            | -1.30965200  | 2.517952000  | 0.713418000  | H                                            | 1.498083000  | 1.433769000  | 1.479097000  |

|    |              |              |              |    |              |              |              |
|----|--------------|--------------|--------------|----|--------------|--------------|--------------|
| C  | 0.634895000  | 3.267543000  | 0.446092000  | C  | 1.874492000  | -0.508526000 | 2.11206600   |
| H  | 1.673493000  | 3.073612000  | 0.167423000  | H  | 1.667736000  | -1.578789000 | 2.08226400   |
| H  | 0.388036000  | 4.287198000  | 0.740561000  | H  | 2.579594000  | -0.172581000 | 2.87199700   |
| H  | 1.111036000  | 0.821773000  | -0.32703200  | H  | 1.257114000  | 0.504292000  | -0.87036100  |
| O  | -2.32528300  | -2.330999000 | 0.322629000  | O  | -3.443493000 | -0.795606000 | -0.60914200  |
| H  | -3.217072000 | -0.73859500  | 1.367208000  | H  | -2.966180000 | -1.331763000 | 1.36311500   |
| H  | -3.19893300  | -2.455139000 | -0.124273000 | H  | -4.232249000 | -0.330005000 | -0.23704600  |
| O  | 3.526371000  | 0.017561000  | -0.56629200  | O  | 2.152121000  | 0.767931000  | -1.682186000 |
| H  | 3.438925000  | 0.462091000  | 0.296266000  | H  | 1.899571000  | 0.238713000  | -2.46057700  |
| Na | 3.273421000  | -2.11865800  | -0.51106800  | Na | 3.690764000  | -0.054870000 | -0.29141600  |

### Ints

E(scf) = -743.274536505 a.u.

|    |              |              |             |
|----|--------------|--------------|-------------|
| C  | -2.334410000 | 0.591868000  | 0.61191700  |
| C  | -1.025215000 | 1.146533000  | 0.018076000 |
| C  | 0.152322000  | 0.313854000  | 0.559538000 |
| C  | -0.100039000 | -1.106738000 | 0.65366900  |
| C  | -1.337100000 | -1.669540000 | 0.46829200  |
| C  | -2.589557000 | -0.885537000 | 0.34140900  |
| H  | -2.298526000 | 0.741518000  | 1.71434800  |
| H  | -3.196594000 | 1.188976000  | 0.23896700  |
| H  | -1.428233000 | -2.759651000 | 0.49403600  |
| C  | 1.039160000  | -2.049185000 | 0.93892900  |
| H  | 0.737058000  | -3.090856000 | 0.76601300  |
| H  | 1.919065000  | -1.836646000 | 0.31376000  |
| H  | 1.385074000  | -1.977383000 | 1.98047000  |
| C  | -0.962696000 | 2.628141000  | 0.39694200  |
| H  | -0.853449000 | 2.767000000  | 1.48194700  |
| H  | -0.132051000 | 3.154104000  | -0.09308000 |
| H  | -1.888245000 | 3.133002000  | 0.08354900  |
| C  | -1.076667000 | 1.067541000  | -1.51736200 |
| H  | -1.980516000 | 1.553632000  | -1.91775200 |
| H  | -0.202141000 | 1.570272000  | -1.95699300 |
| H  | -1.088340000 | 0.026574000  | -1.86083300 |
| C  | 1.355379000  | 0.954766000  | 0.927461000 |
| H  | 1.332690000  | 2.031557000  | 0.720392000 |
| C  | 2.585079000  | 0.562035000  | 1.455728000 |
| H  | 2.769390000  | -0.421998000 | 1.89167400  |
| H  | 3.273156000  | 1.351290000  | 1.775524000 |
| H  | 1.272971000  | -0.123971000 | -1.25159500 |
| O  | -3.181065000 | -1.120867000 | -0.96386200 |
| H  | -3.350313000 | -1.255235000 | 1.11694900  |
| H  | -4.046645000 | -0.643948000 | -0.95222200 |
| O  | 1.905646000  | -0.384785000 | -1.95980900 |
| H  | 1.571812000  | -1.261895000 | -2.24324400 |
| Na | 3.833604000  | -0.129414000 | -0.73092100 |

### 2s

E(scf) = -743.295128858 a.u.

|   |              |              |             |
|---|--------------|--------------|-------------|
| C | 0.734695000  | -1.815980000 | -0.90817600 |
| C | 1.456339000  | -0.914457000 | 0.10695100  |
| C | 1.007874000  | 0.547727000  | -0.02294300 |
| C | -0.086915000 | 0.917578000  | -0.73548400 |
| C | -0.934702000 | -0.070475000 | -1.49486900 |
| C | -0.737615000 | -1.519885000 | -1.10555200 |
| H | 1.219627000  | -1.693001000 | -1.90352000 |
| H | 0.882471000  | -2.880935000 | -0.61957100 |
| H | -0.732423000 | 0.044551000  | -2.57852200 |
| C | -0.592304000 | 2.324387000  | -0.86020600 |
| H | -1.687625000 | 2.323599000  | -0.73466000 |

### TS2s

E(scf) = -743.257407875.u.

$v_{\min} = -1188.2010^{-1}$

|    |              |              |             |
|----|--------------|--------------|-------------|
| C  | -2.016125000 | 0.568590000  | 0.878233000 |
| C  | -0.850505000 | 1.134301000  | 0.046747000 |
| C  | 0.348123000  | 0.162257000  | 0.171328000 |
| C  | -0.052753000 | -1.247225000 | -0.08671600 |
| C  | -1.330865000 | -1.673380000 | -0.00260300 |
| C  | -2.470405000 | -0.827804000 | 0.45563400  |
| H  | -1.685243000 | 0.527794000  | 1.93100600  |
| H  | -2.885973000 | 1.249775000  | 0.851181000 |
| H  | -1.584056000 | -2.695882000 | -0.30531200 |
| C  | 1.000768000  | -2.189619000 | -0.60559200 |
| H  | 0.626275000  | -3.217678000 | -0.69769400 |
| H  | 1.339926000  | -1.861581000 | -1.60099400 |
| H  | 1.901034000  | -2.217958000 | 0.02515200  |
| C  | -0.529727000 | 2.536334000  | 0.560240000 |
| H  | -0.363673000 | 2.555229000  | 1.64520500  |
| H  | 0.368337000  | 2.946712000  | 0.075199000 |
| H  | -1.362747000 | 3.219619000  | 0.34330200  |
| C  | -1.253519000 | 1.270084000  | -1.42722900 |
| H  | -2.172032000 | 1.864808000  | -1.53535800 |
| H  | -0.453109000 | 1.766065000  | -1.99236000 |
| H  | -1.442398000 | 0.293243000  | -1.88551800 |
| C  | 1.237611000  | 0.380187000  | 1.306875000 |
| H  | 1.498083000  | 1.433769000  | 1.479097000 |
| C  | 1.874492000  | -0.508526000 | 2.112066000 |
| H  | 1.667736000  | -1.578789000 | 2.08226400  |
| H  | 2.579594000  | -0.172581000 | 2.87199700  |
| H  | 1.257114000  | 0.504292000  | -0.87036100 |
| O  | -3.443493000 | -0.795606000 | -0.60914200 |
| H  | -2.966180000 | -1.331763000 | 1.36311500  |
| H  | -4.232249000 | -0.330005000 | -0.23704600 |
| O  | 2.152121000  | 0.767931000  | -1.68218600 |
| H  | 1.899571000  | 0.238713000  | -2.46577000 |
| Na | 3.690764000  | -0.054870000 | -0.29141600 |

|    |              |              |             |
|----|--------------|--------------|-------------|
| H  | -0.155118000 | 3.010633000  | -0.12851500 |
| H  | -0.390632000 | 2.737547000  | -1.86124200 |
| C  | 1.864410000  | 1.500237000  | 0.698736000 |
| H  | 2.234990000  | 1.151916000  | 1.672879000 |
| C  | 2.302831000  | 2.692011000  | 0.272149000 |
| H  | 2.042354000  | 3.089705000  | -0.70862500 |
| H  | 2.958681000  | 3.306332000  | 0.887715000 |
| C  | 2.960263000  | -1.021911000 | -0.18682300 |
| H  | 3.201641000  | -0.613405000 | -1.17781000 |
| H  | 3.563117000  | -0.482401000 | 0.55565200  |
| H  | 3.273124000  | -2.075732000 | -0.16972400 |
| C  | 1.229443000  | -1.411323000 | 1.54558200  |
| H  | 1.535076000  | -2.464093000 | 1.63387700  |
| H  | 1.826988000  | -0.838070000 | 2.26735400  |
| H  | 0.176165000  | -1.340431000 | 1.841893000 |
| H  | -2.000836000 | 0.199463000  | -1.36527900 |
| H  | -1.138353000 | -2.176459000 | -1.91088600 |
| O  | -1.514850000 | -1.745488000 | 0.08770800  |
| O  | -3.823656000 | 0.949499000  | 0.39436600  |
| H  | -3.899150000 | 0.274757000  | -0.30575100 |
| Na | -2.195236000 | 0.006892000  | 1.49723400  |
| H  | -1.280351000 | -2.649315000 | 0.42236700  |

- With potassium hydroxide:

| <b>I<sub>k</sub></b>         |              |              | <b>TS1<sub>k</sub></b>       |              |                  |              |
|------------------------------|--------------|--------------|------------------------------|--------------|------------------|--------------|
| E(scf) = -1180.88449886 a.u. |              |              | E(scf) = -1180.86344412 a.u. |              |                  |              |
| C                            | -2.439383000 | -0.272665000 | $v_{\min}$                   | = -1333.3081 | cm <sup>-1</sup> |              |
| C                            | -1.235113000 | 0.276655000  | C                            | 2.295470000  | -0.492942000     | 0.88491100   |
| C                            | -0.264615000 | 0.957663000  | C                            | 1.126906000  | -1.124172000     | 0.10882100   |
| C                            | 0.003088000  | 0.094973000  | C                            | -0.090376000 | -0.169986000     | 0.20681800   |
| C                            | -0.809224000 | -0.914736000 | C                            | 0.284774000  | 1.228784000      | -0.14396400  |
| C                            | -2.079436000 | -1.273020000 | C                            | 1.556811000  | 1.679159000      | -0.11791000  |
| H                            | -2.974352000 | 0.575084000  | C                            | 2.719043000  | 0.882925000      | 0.371588000  |
| H                            | -3.155120000 | -0.741768000 | H                            | 1.981571000  | -0.393975000     | 1.93920200   |
| H                            | -0.554654000 | -1.523864000 | H                            | 3.176085000  | -1.160794000     | 0.884629000  |
| C                            | 1.214403000  | 0.463850000  | H                            | 1.787671000  | 2.682785000      | -0.49349100  |
| H                            | 1.424615000  | -0.268560000 | C                            | -0.801766000 | 2.120452000      | -0.68275100  |
| H                            | 2.094249000  | 0.568329000  | H                            | -0.423294000 | 3.113981000      | -0.95757400  |
| H                            | 1.081131000  | 1.447150000  | H                            | -1.25069100  | 1.661639000      | -1.578245000 |
| C                            | -1.712554000 | 1.286612000  | H                            | -1.624083000 | 2.268391000      | 0.03299100   |
| H                            | -2.294030000 | 2.097955000  | C                            | 0.837627000  | -2.500229000     | 0.70142600   |
| H                            | -0.862718000 | 1.745639000  | H                            | 0.683268000  | -2.461540000     | 1.787701000  |
| H                            | -2.347700000 | 0.798203000  | H                            | -0.060990000 | -2.946636000     | 0.25089600   |
| C                            | -0.51386700  | -0.856161000 | H                            | 1.677968000  | -3.182863000     | 0.511595000  |
| H                            | -1.189787000 | -1.345954000 | C                            | 1.504559000  | -1.331836000     | -1.36349400  |
| H                            | 0.345091000  | -0.466612000 | H                            | 2.425662000  | -1.925036000     | -1.45708900  |
| H                            | -0.171550000 | -1.634783000 | H                            | 0.695478000  | -1.859995000     | -1.88457800  |
| C                            | -0.736797000 | 2.308620000  | H                            | 1.678561000  | -0.378159000     | -1.87400800  |
| H                            | -1.740907000 | 2.339885000  | C                            | -0.928762000 | -0.314098000     | 1.39713300   |
| C                            | -0.014268000 | 3.428076000  | H                            | -1.269530000 | -1.365497000     | 1.63205200   |
| H                            | 0.990855000  | 3.430252000  | C                            | -1.456320000 | 0.646337000      | 2.19849000   |
| H                            | -0.388617000 | 4.379351000  | H                            | -1.186792000 | 1.699630000      | 2.10419900   |
| H                            | 0.762600000  | 1.113171000  | H                            | -2.147080000 | 0.395560000      | 3.00403500   |
| O                            | -1.940519000 | -2.620686000 | H                            | -0.96083000  | -0.601223000     | -0.80894100  |
| H                            | -2.926644000 | -1.261931000 | O                            | 3.676469000  | 0.804187000      | -0.70447100  |
| H                            | -2.835299000 | -2.884835000 | H                            | 3.218899000  | 1.447064000      | 1.239938000  |
| O                            | 3.329273000  | 0.859795000  | H                            | 4.475347000  | 0.366083000      | -0.32090800  |
| H                            | 3.032108000  | 1.698767000  | O                            | -1.786550000 | -0.969014000     | -1.68068200  |
| K                            | 2.743542000  | -1.525134000 | H                            | -1.361686000 | -0.654317000     | -2.49793800  |
|                              |              |              | K                            | -3.627510000 | 0.045640000      | -0.19998100  |
| <b>Int<sub>k</sub></b>       |              |              | <b>TS2<sub>k</sub></b>       |              |                  |              |
| E(scf) = -1180.87785427 a.u. |              |              | E(scf) = -1180.86765647a.u.  |              |                  |              |
| C                            | 2.696351000  | 0.610310000  | $v_{\min}$                   | = -1513.1702 | cm <sup>-1</sup> |              |
| C                            | 1.341857000  | 1.152243000  | C                            | -1.229004000 | -1.829910000     | 0.61925000   |
| C                            | 0.211585000  | 0.338164000  | C                            | -1.745727000 | -0.551832000     | -0.06255900  |
| C                            | 0.471357000  | -1.075842000 | C                            | -0.902912000 | 0.668861000      | 0.34718100   |
| C                            | 1.689194000  | -1.651095000 | C                            | 0.186611000  | 0.518113000      | 1.185191000  |
| C                            | 2.927304000  | -0.876429000 | C                            | 0.883849000  | -0.742020000     | 1.38791900   |
| H                            | 2.755560000  | 0.797493000  | C                            | 0.285216000  | -1.939564000     | 0.69567700   |
| H                            | 3.524138000  | 1.191772000  | H                            | -1.600714000 | -1.856483000     | 1.65764800   |
| H                            | 1.781690000  | -2.739542000 | H                            | -1.668834000 | -2.708358000     | 0.11320100   |
| C                            | -0.639332000 | -2.004202000 | H                            | 1.121754000  | -0.933897000     | 2.455107000  |
| H                            | -0.340148000 | -3.053206000 | C                            | 0.839098000  | 1.685072000      | 1.875566000  |
| H                            | -1.557922000 | -1.834243000 | H                            | 1.253257000  | 1.355926000      | 2.839622000  |
| H                            | -0.917116000 | -1.869321000 | H                            | 1.693159000  | 2.082937000      | 1.303249000  |
| C                            | 1.313451000  | 2.643738000  | H                            | 0.150241000  | 2.520150000      | 2.050382000  |
| H                            | 1.280258000  | 2.811427000  | C                            | -1.355447000 | 1.938324000      | -0.19194600  |
| H                            | 0.453822000  | 3.162875000  | H                            | -2.38256700  | 1.928387000      | -0.57791100  |
| H                            | 2.217705000  | 3.134350000  | C                            | -0.699840000 | 3.109397000      | -0.36929400  |
| C                            | 1.264225000  | 1.033630000  | H                            | 0.337478000  | 3.271417000      | -0.08031800  |
| H                            | 2.123199000  | 1.520494000  | H                            | -1.207171000 | 3.960695000      | -0.82055900  |
| H                            | 0.347107000  | 1.512146000  | C                            | -3.199778000 | -0.36228900      | 0.405383000  |

|   |              |              |             |   |              |              |             |
|---|--------------|--------------|-------------|---|--------------|--------------|-------------|
| H | 1.260583000  | -0.015408000 | 1.87954600  | H | -3.244619000 | -0.160468000 | 1.48347200  |
| C | -0.966736000 | 0.995586000  | -1.05800200 | H | -3.705124000 | 0.461330000  | -0.11415300 |
| H | -0.953540000 | 2.066731000  | -0.82331000 | H | -3.782674000 | -1.272932000 | 0.20763800  |
| C | -2.150758000 | 0.628940000  | -1.68411200 | C | -1.785125000 | -0.727820000 | -1.58915800 |
| H | -2.347890000 | -0.357487000 | -2.10677200 | H | -2.435819000 | -1.570358000 | -1.86638000 |
| H | -2.844209000 | 1.420857000  | -1.98372300 | H | -2.183503000 | 0.170959000  | -2.07954100 |
| H | -1.029886000 | -0.232629000 | 1.05104400  | H | -0.793534000 | -0.935905000 | -2.00583100 |
| O | 3.416788000  | -1.152858000 | 1.11675700  | H | 2.139290000  | -0.531376000 | 0.89724900  |
| H | 3.747338000  | -1.222629000 | -0.94766600 | H | 0.550796000  | -2.864086000 | 1.24445500  |
| H | 4.280245000  | -0.677167000 | 1.18552500  | O | 0.865050000  | -2.031724000 | -0.63657900 |
| O | -1.640850000 | -0.560950000 | 1.74866900  | O | 3.303380000  | -0.282440000 | 0.37390200  |
| H | -1.194688000 | -1.373768000 | 2.06286000  | H | 3.551838000  | -1.182975000 | 0.097105000 |
| K | -3.986565000 | -0.068554000 | 0.57441300  | H | 0.377628000  | -2.753572000 | -1.10734000 |
|   |              |              |             | K | 1.622107000  | 0.470206000  | -1.54815500 |

2<sub>k</sub>

E(scf) = -1180.89235949 a.u.

|   |              |              |             |
|---|--------------|--------------|-------------|
| C | -1.251753000 | -1.747781000 | 0.91526300  |
| C | -1.795545000 | -0.734692000 | -0.10536500 |
| C | -1.125070000 | 0.636972000  | 0.052926000 |
| C | 0.001380000  | 0.818022000  | 0.789135000 |
| C | 0.664130000  | -0.299775000 | 1.552644000 |
| C | 0.246455000  | -1.694568000 | 1.138235000 |
| H | -1.730375000 | -1.553638000 | 1.90211900  |
| H | -1.565951000 | -2.772042000 | 0.61245100  |
| H | 0.454267000  | -0.165315000 | 2.63260300  |
| C | 0.743170000  | 2.115394000  | 0.91907500  |
| H | 1.825236000  | 1.916568000  | 0.81324500  |
| H | 0.435759000  | 2.864449000  | 0.18197900  |
| H | 0.599914000  | 2.562321000  | 1.91613600  |
| C | -1.797003000 | 1.717977000  | -0.68286100 |
| H | -2.211592000 | 1.432962000  | -1.65982000 |
| C | -2.029175000 | 2.971572000  | -0.27002900 |
| H | -1.715197000 | 3.328688000  | 0.71068200  |
| H | -2.563775000 | 3.683037000  | -0.89853600 |
| C | -3.305507000 | -0.606928000 | 0.14370200  |
| H | -3.510709000 | -0.186414000 | 1.13795700  |
| H | -3.789086000 | 0.039435000  | -0.60095300 |
| H | -3.783518000 | -1.595781000 | 0.08975400  |
| C | -1.602702000 | -1.247628000 | -1.54320000 |
| H | -2.072672000 | -2.235402000 | -1.65874200 |
| H | -2.072629000 | -0.577420000 | -2.27567900 |
| H | -0.541738000 | -1.346601000 | -1.79715100 |
| H | 1.761326000  | -0.194354000 | 1.44929900  |
| H | 0.522084000  | -2.415541000 | 1.94188000  |
| O | 0.993884000  | -2.022964000 | -0.04713400 |
| O | 3.774373000  | 0.658529000  | 0.501475000 |
| H | 3.592124000  | 0.930174000  | 1.416309000 |
| H | 0.638211000  | -2.883963000 | -0.38399800 |
| K | 2.373262000  | -0.078266000 | -1.40112700 |

- With potassium hydroxide (Real system):

| <b>I</b>                     |              |              | <b>TS1</b>                   |                                       |              |              |             |            |
|------------------------------|--------------|--------------|------------------------------|---------------------------------------|--------------|--------------|-------------|------------|
| E(scf) = -2383.87582120 a.u. |              |              | E(scf) = -2383.85609406 a.u. |                                       |              |              |             |            |
| C                            | -13.55839700 | 0.72053600   | 0.92315900                   | $v_{\min} = -1670.2610\text{cm}^{-1}$ | C            | -13.78647100 | 0.80383700  | 0.68569400 |
| C                            | -14.62653200 | -0.271854000 | 1.39764100                   | C                                     | -14.87162500 | -0.12715100  | 1.2409470   |            |
| C                            | -15.19212000 | -1.10692300  | 0.26857500                   | C                                     | -15.33625500 | -1.15250700  | 0.2287040   |            |
| C                            | -14.08312000 | -1.93101500  | -0.34890100                  | C                                     | -14.17052900 | -2.03494300  | -0.1592490  |            |
| C                            | -12.80779500 | -1.17116000  | -0.59182300                  | C                                     | -12.89842300 | -1.2852610   | -0.4478410  |            |
| C                            | -12.54061400 | 0.02231000   | 0.00682700                   | C                                     | -12.69507500 | -0.00145100  | -0.0404110  |            |
| H                            | -14.18123000 | -0.96383500  | 2.14885100                   | H                                     | -14.47430600 | -0.67339100  | 2.1269620   |            |
| H                            | -15.44026900 | 0.28710900   | 1.91257000                   | H                                     | -15.73060700 | 0.48555900   | 1.59634200  |            |
| H                            | -13.87353000 | -2.78702800  | 0.32778300                   | H                                     | -13.99409100 | -2.75497400  | 0.6683220   |            |
| H                            | -14.42732100 | -2.38983400  | -1.2940680                   | H                                     | -14.4382040  | -2.65979400  | -1.0312560  |            |
| C                            | -12.86412500 | 1.28175300   | 2.17117900                   | C                                     | -13.18921900 | 1.57427300   | 1.87042400  |            |
| H                            | -12.15381200 | 2.08277100   | 1.92717200                   | H                                     | -12.46643900 | 2.33618100   | 1.54923400  |            |
| H                            | -13.61235000 | 1.69983200   | 2.85959800                   | H                                     | -13.98780200 | 2.08644100   | 2.42603200  |            |
| H                            | -12.31446900 | 0.49594100   | 2.70738100                   | H                                     | -12.67552200 | 0.89661100   | 2.56621700  |            |
| C                            | -14.21384900 | 1.88776500   | 0.16919600                   | C                                     | -14.40651000 | 1.81849900   | -0.2874540  |            |
| H                            | -14.91508200 | 2.42109000   | 0.82733500                   | H                                     | -15.16106200 | 2.43036700   | 0.22790700  |            |
| H                            | -13.46539000 | 2.61638800   | -0.17206200                  | H                                     | -13.64844300 | 2.50321200   | -0.6922600  |            |
| H                            | -14.76853500 | 1.54398800   | -0.71301100                  | H                                     | -14.89310300 | 1.32202200   | -1.1368930  |            |
| C                            | -11.88038900 | -1.85206300  | -1.55326800                  | H                                     | -11.89647300 | -2.08327000  | -1.2280540  |            |
| H                            | -11.28975100 | -2.64228800  | -1.0625020                   | C                                     | -11.28166800 | -2.7261260   | -0.5777020  |            |
| H                            | -12.45464300 | -2.35036400  | -2.3474020                   | H                                     | -12.4090360  | -2.75800800  | -1.9282260  |            |
| H                            | -11.16716200 | -1.16363900  | -2.0201340                   | H                                     | -11.2030190  | -1.453034000 | -1.796793   |            |
| C                            | -11.30594900 | 0.77110200   | -0.1905480                   | C                                     | -11.4705410  | 0.74754700   | -0.2903270  |            |
| H                            | -11.41884200 | 1.86104000   | -0.18247000                  | H                                     | -11.61103000 | 1.82381000   | -0.4386620  |            |
| C                            | -10.03925300 | 0.28378400   | -0.27021300                  | C                                     | -10.18738200 | 0.29500700   | -0.2650430  |            |
| H                            | -9.88220800  | -0.79595400  | -0.18936100                  | H                                     | -10.00131100 | -0.7574410   | -0.0316310  |            |
| C                            | -8.84379400  | 1.07745800   | -0.39352200                  | C                                     | -9.01113000  | 1.09882400   | -0.46867700 |            |
| C                            | -7.62900600  | 0.4346690    | -0.39008400                  | C                                     | -7.77814800  | 0.4974650    | -0.36472200 |            |
| H                            | -7.65439200  | -0.65855200  | -0.30826600                  | H                                     | -7.77789900  | -0.5754500   | -0.1363150  |            |
| C                            | -6.33514900  | 1.01759700   | -0.46525100                  | C                                     | -6.4981990   | 1.09466500   | -0.51032900 |            |
| H                            | -6.25977900  | 2.10575300   | -0.54426700                  | H                                     | -6.44747200  | 2.16293100   | -0.7388930  |            |
| C                            | -5.17748300  | 0.28463900   | -0.43091300                  | C                                     | -5.32244700  | 0.39987900   | -0.37184000 |            |
| H                            | -5.26547600  | -0.80520200  | -0.35057300                  | H                                     | -5.38956300  | -0.67050500  | -0.1421110  |            |
| C                            | -8.97859500  | 2.56583900   | -0.49799500                  | C                                     | -9.18159800  | 2.55693900   | -0.77000800 |            |
| H                            | -9.60698900  | 2.84739100   | -1.35536400                  | H                                     | -9.78614100  | 2.70970400   | -1.67615500 |            |
| H                            | -9.47277700  | 2.98182600   | 0.39316400                   | H                                     | -9.71667700  | 3.06990600   | 0.04372700  |            |
| H                            | -8.01477000  | 3.07210000   | -0.60977300                  | H                                     | -8.22733400  | 3.07305200   | -0.91543000 |            |
| C                            | -3.84997900  | 0.81060000   | -0.47940100                  | C                                     | -4.00729700  | 0.93684600   | -0.49063500 |            |
| C                            | -2.78855400  | -0.06963900  | -0.42031100                  | C                                     | -2.92589100  | 0.09382500   | -0.31031800 |            |
| H                            | -3.04162600  | -1.13393200  | -0.34532200                  | H                                     | -3.16131300  | -0.95413500  | -0.0874520  |            |
| C                            | -1.40704500  | 0.23616500   | -0.43667500                  | C                                     | -1.55213400  | 0.4140940    | -0.37113500 |            |
| H                            | -1.09909300  | 1.28470800   | -0.50749800                  | H                                     | -1.25952200  | 1.44692800   | -0.5874380  |            |
| C                            | -0.41530700  | -0.71273900  | -0.35890100                  | C                                     | -0.54365100  | -0.50465600  | -0.1677430  |            |
| H                            | -0.72189900  | -1.76163100  | -0.28631400                  | H                                     | -0.8430790   | -1.53609500  | 0.0481050   |            |
| C                            | -3.67007600  | 2.29532500   | -0.58610900                  | C                                     | -3.8522120   | 2.39609000   | -0.8016110  |            |
| H                            | -4.13249600  | 2.68443400   | -1.50510100                  | H                                     | -4.31950800  | 2.65013300   | -1.76468700 |            |
| H                            | -4.16197600  | 2.81458300   | 0.24914600                   | H                                     | -4.35188800  | 3.01886800   | -0.0449080  |            |
| H                            | -2.61810400  | 2.59641600   | -0.59071400                  | H                                     | -2.80449800  | 2.70912900   | -0.84934100 |            |
| C                            | 0.96573400   | -0.40330100  | -0.36128800                  | C                                     | 0.83118000   | -0.19389400  | -0.2140800  |            |
| H                            | 1.21603200   | 0.66149800   | -0.43803400                  | H                                     | 1.07836600   | 0.85251200   | -0.42960000 |            |
| C                            | 2.02902900   | -1.27761800  | -0.26930300                  | C                                     | 1.90461900   | -1.04759400  | -0.01358800 |            |
| C                            | 3.35499200   | -0.74282200  | -0.27603600                  | C                                     | 3.22514100   | -0.52552200  | -0.08963300 |            |
| H                            | 3.43795800   | 0.34623000   | -0.37106400                  | H                                     | 3.31279300   | 0.54446300   | -0.31252400 |            |
| C                            | 4.51468600   | -1.46214300  | -0.16515500                  | C                                     | 4.39017200   | -1.23604000  | 0.09832300  |            |
| H                            | 4.44756400   | -2.54914600  | -0.06176300                  | H                                     | 4.30754100   | -2.30349500  | 0.3245320   |            |
| C                            | 1.85452500   | -2.76205500  | -0.15368900                  |                                       |              |              |             |            |

|   |              |              |             |   |              |             |             |
|---|--------------|--------------|-------------|---|--------------|-------------|-------------|
| H | 2.28706600   | -3.13930000  | 0.78462300  | C | 1.72279500   | -2.50661400 | 0.2880880   |
| H | 0.80470400   | -3.06956300  | -0.18274700 | H | 2.15263600   | -2.76654700 | 1.26644900  |
| H | 2.37885200   | -3.28587300  | -0.96600100 | H | 0.67158000   | -2.81030200 | 0.29701500  |
| C | 5.80548500   | -0.86245700  | -0.16881200 | H | 2.24329200   | -3.13150000 | -0.45201200 |
| H | 5.82392100   | 0.22787100   | -0.28558200 | C | 5.68190500   | -0.66989000 | 0.01970700  |
| C | 7.02128700   | -1.48236600  | -0.03133800 | H | 5.72149600   | 0.40162600  | -0.21078900 |
| C | 8.21392300   | -0.66772000  | -0.05243600 | C | 6.90112400   | -1.29991900 | 0.20430300  |
| H | 8.06941400   | 0.41132900   | -0.20953900 | C | 8.10216000   | -0.53272800 | 0.10689100  |
| C | 9.48234900   | -1.10142000  | 0.11438600  | H | 7.96928800   | 0.52899800  | -0.13356900 |
| C | 7.17545100   | -2.96085800  | 0.14741200  | C | 9.37188200   | -0.9995500  | 0.33609800  |
| H | 7.64717900   | -3.19336400  | 1.11396900  | C | 7.0022670    | -2.76276600 | 0.5239400   |
| H | 6.22307300   | -3.49884500  | 0.10293700  | H | 7.5101030    | -2.92245500 | 1.48674600  |
| H | 7.83822900   | -3.38192800  | -0.62317600 | H | 6.0267800    | -3.25561100 | 0.5794500   |
| O | -16.19478500 | -2.01671300  | 0.71852400  | H | 7.60309300   | -3.29316600 | -0.22873200 |
| H | -16.92356800 | -1.46317500  | 1.09472600  | O | -16.35781100 | -2.00218400 | 0.7492600   |
| H | -15.62065800 | -0.43287900  | -0.5129610  | H | -17.12071800 | -1.41374300 | 0.9737510   |
| C | 12.56753500  | -1.78476200  | -0.24930500 | H | -15.71314700 | -0.6300990  | -0.6843490  |
| C | 11.79328300  | -0.61345900  | -0.86675000 | C | 11.26482800  | 0.7029900   | 2.36872600  |
| C | 10.671049000 | -0.18668200  | 0.11541100  | C | 11.61753500  | -0.4186700  | 1.37763400  |
| C | 11.18622700  | -0.03197800  | 1.53384800  | C | 10.6332110   | -0.29858400 | 0.17827000  |
| C | 12.32913400  | -0.600499000 | 1.94781700  | C | 10.54968800  | 1.09738200  | -0.35093300 |
| C | 13.19800400  | -1.47840500  | 1.10822800  | C | 10.95702400  | 2.16762400  | 3.605110    |
| H | 11.87241500  | -2.63374500  | -0.12884900 | C | 11.3794710   | 2.11334700  | 1.79035300  |
| H | 13.35224900  | -2.12987800  | -0.94380900 | H | 10.22390200  | 0.5424300   | 2.69934900  |
| H | 12.672366000 | -0.42516000  | 2.97362400  | H | 11.89604300  | 0.6332270   | 3.27217700  |
| C | 10.32318900  | 0.78384200   | 2.44477500  | H | 10.97085500  | 3.15801400  | -0.10882600 |
| H | 10.82958300  | 1.02758100   | 3.38732300  | C | 10.08832800  | 1.2652510   | -1.7736800  |
| H | 10.00080800  | 1.70987100   | 1.94026200  | H | 10.28840900  | 2.27758400  | -2.14950200 |
| H | 9.39291700   | 0.24728700   | 2.69107200  | H | 10.59464700  | 0.53397300  | -2.42139600 |
| C | 11.19564500  | -1.04821800  | -2.20308700 | H | 9.0127400    | 1.0752220   | -1.89403500 |
| H | 10.57060700  | -1.94491600  | -2.09959800 | C | 11.50254100  | -1.76417300 | 2.0905200   |
| H | 10.56557500  | -0.25531400  | -2.63100200 | H | 10.53030500  | -1.89262200 | 2.58342700  |
| H | 11.98974200  | -1.27404200  | -2.92831700 | H | 11.6381470   | -2.60056100 | 1.38961400  |
| C | 12.71379500  | 0.58181300   | -1.12193800 | H | 12.27887400  | -1.8499190  | 2.86312300  |
| H | 13.57073100  | 0.29332000   | -1.74594000 | C | 13.06861200  | -0.27399500 | 0.90772900  |
| H | 12.16574800  | 1.37556600   | -1.65014700 | H | 13.75556900  | -0.25914700 | 1.76504900  |
| H | 13.11279500  | 0.99651900   | -0.19001600 | H | 13.34689100  | -1.11626000 | 0.26088800  |
| O | 14.48118800  | -0.83711400  | 0.99857800  | H | 13.21996700  | 0.66836500  | 0.36926400  |
| H | 15.07928900  | -1.49950600  | 0.57226200  | O | 12.715460    | 2.64787200  | 1.87354500  |
| O | 8.74160900   | 2.84339000   | 0.1337150   | H | 12.91445000  | 2.72854400  | 2.8389250   |
| H | 8.34562300   | 2.23977700   | 0.78383100  | O | 11.93187000  | -1.51695700 | -1.7967680  |
| H | 10.27337300  | 0.85381700   | -0.20618400 | H | 11.19046700  | -1.7112240  | -2.39905200 |
| K | 10.61129300  | 4.30155300   | -0.47890800 | H | 11.24636400  | -0.96089300 | -0.7942000  |
| H | 9.67803600   | -2.16676300  | 0.29648600  | K | 13.63402600  | 0.30796200  | -2.44309400 |
| H | 13.34454300  | -2.47463500  | 1.66513200  | H | 9.4585900    | -2.04759800 | 0.64383300  |
|   |              |              |             | H | 10.6889280   | 2.80193400  | 2.40151200  |

**Int**

E(scf) = -2383.88980483 a.u.

|   |             |             |             |
|---|-------------|-------------|-------------|
| C | 13.75578300 | 0.10640400  | -0.5825390  |
| C | 14.77327800 | -1.02108700 | -0.36522200 |
| C | 15.01547600 | -1.31521000 | 1.09987000  |
| C | 13.72378900 | -1.78340900 | 1.73094800  |
| C | 12.53259700 | -0.93074100 | 1.38260500  |
| C | 12.51749500 | -0.08961600 | 0.30981100  |
| H | 14.40197100 | -1.95480900 | -0.8467800  |
| H | 15.72814800 | -0.75331000 | -0.87135100 |
| H | 13.54449100 | -2.83152300 | 1.40868100  |
| H | 13.8341600  | -1.83504100 | 2.82979300  |
| C | 13.36088700 | 0.09155600  | -2.06472100 |
| H | 12.71212200 | 0.93653800  | -2.33003200 |

**TS2**

E(scf) = -2383.86656597.u.

$v_{\min} = -1681.6380 \text{ cm}^{-1}$

|   |              |             |             |
|---|--------------|-------------|-------------|
| C | -13.27344500 | -0.38955200 | 0.07664100  |
| C | -11.98683300 | -1.1786590  | 0.3788130   |
| C | -10.77398000 | -0.58230000 | -0.3627420  |
| C | -10.94184100 | 0.52058000  | -1.1947490  |
| C | -12.04713800 | 1.44698900  | -1.0717410  |
| C | -13.08020200 | 1.11375100  | -0.0239840  |
| H | -13.6853090  | -0.72577700 | -0.9009260  |
| H | -14.03976900 | -0.64396300 | 0.8437500   |
| H | -12.48775400 | 1.72934400  | -2.043750   |
| C | -9.93617200  | 0.91930300  | -2.23676200 |
| H | -9.27347300  | 1.72041200  | -1.86990500 |



|   |             |             |             |   |              |             |             |
|---|-------------|-------------|-------------|---|--------------|-------------|-------------|
| H | 14.2605800  | 0.15193200  | -2.69416100 | H | -9.30353500  | 0.0893120   | -2.5702980  |
| H | 12.82881100 | -0.83407800 | -2.32464500 | H | -10.45789100 | 1.34083400  | -3.1087560  |
| C | 14.40237100 | 1.46554900  | -0.27032000 | C | -12.22563500 | -2.61840500 | -0.1091590  |
| H | 15.26278800 | 1.64084000  | -0.93249800 | H | -12.34763200 | -2.6512060  | -1.2003860  |
| H | 13.69476500 | 2.29206800  | -0.42388700 | H | -11.40373900 | -3.29459700 | 0.1615950   |
| H | 14.75547400 | 1.51946600  | 0.76754600  | H | -13.14188100 | -3.02300800 | 0.3453070   |
| C | 11.38511800 | -1.0903520  | 2.33557400  | C | -11.7352200  | -1.24735000 | 1.89350600  |
| H | 10.75481400 | -1.9607410  | 2.0908200   | H | -12.59004900 | -1.71543700 | 2.4043830   |
| H | 11.75835300 | -1.26246400 | 3.35565700  | H | -10.84468700 | -1.85155700 | 2.1181190   |
| H | 10.72367500 | -0.21615300 | 2.34915500  | H | -11.59348100 | -0.25287200 | 2.3327100   |
| C | 11.3722800  | 0.73049000  | -0.06599900 | H | -11.45601800 | 2.59081900  | -0.7619150  |
| H | 11.61991800 | 1.6999940   | -0.5125300  | H | -14.05064700 | 1.59290400  | -0.2844930  |
| C | 10.05206100 | 0.3934950   | -0.01515600 | O | -12.62905200 | 1.66579800  | 1.24039400  |
| H | 9.78291100  | -0.6075970  | 0.33610600  | O | -10.76434000 | 3.68191800  | -0.4128250  |
| C | 8.94782700  | 1.21548500  | -0.42036600 | H | -10.28909000 | 3.86073200  | -1.2435680  |
| C | 7.67175000  | 0.69888600  | -0.3311980  | H | -13.24203500 | 1.31640500  | 1.93482200  |
| H | 7.59942600  | -0.32814600 | 0.05010400  | C | -9.53529700  | -1.27528800 | -0.1789580  |
| C | 6.43615900  | 1.30864300  | -0.65524200 | C | -8.24581600  | -0.82470600 | -0.3625360  |
| H | 6.43969700  | 2.33413600  | -1.03632900 | H | -8.07934300  | 0.20576900  | -0.6880040  |
| C | 5.22295400  | 0.66686500  | -0.50534000 | C | -7.06149100  | -1.58239200 | -0.1245770  |
| H | 5.24996700  | -0.36048400 | -0.11963200 | C | -5.83128600  | -0.96794700 | -0.2944360  |
| C | 9.23062200  | 2.59932300  | -0.92228700 | H | -5.85528900  | 0.08182000  | -0.61155100 |
| H | 9.77246300  | 3.19561700  | -0.17218500 | C | -4.5462260   | -1.52217400 | -0.10641700 |
| H | 9.87646900  | 2.57837600  | -1.81434800 | H | -4.47309600  | -2.57014900 | 0.19936100  |
| H | 8.31944300  | 3.14623300  | -1.18709600 | C | -3.37826000  | -0.8134900  | -0.28346600 |
| C | 3.93838600  | 1.18784500  | -0.79313900 | H | -3.46484200  | 0.23761300  | -0.58354100 |
| C | 2.82080500  | 0.38788400  | -0.56832400 | C | -7.18592500  | -3.01353600 | 0.30817800  |
| H | 3.03055000  | -0.61584600 | -0.17568600 | H | -7.72870000  | -3.09458700 | 1.26177100  |
| C | 1.46566400  | 0.68363100  | -0.76973700 | H | -7.76068900  | -3.60143400 | -0.4217000  |
| H | 1.18589100  | 1.66894400  | -1.15823800 | H | -6.21536400  | -3.50177400 | 0.43917900  |
| C | 0.43900400  | -0.21616900 | -0.49362900 | C | -2.05765300  | -1.3102590  | -0.1093580  |
| H | 0.74769200  | -1.19318700 | -0.10377600 | C | -0.98910300  | -0.45053700 | -0.3082890  |
| C | 3.82746100  | 2.58637200  | -1.32726500 | H | -1.24221700  | 0.57790800  | -0.5924880  |
| H | 4.25187600  | 3.32175500  | -0.62653900 | C | 0.38714800   | -0.73230500 | -0.18300700 |
| H | 4.38828300  | 2.70443400  | -2.26710900 | H | 0.69499600   | -1.74661100 | 0.09367000  |
| H | 2.79047300  | 2.87939600  | -1.52370900 | C | 1.38458300   | 0.19865200  | -0.38439100 |
| C | -0.92416500 | 0.03070200  | -0.66654400 | H | 1.07959000   | 1.21473200  | -0.65629900 |
| H | -1.19271900 | 1.02092900  | -1.05509400 | C | -1.87157600  | -2.74439500 | 0.29089100  |
| C | -2.00034100 | -0.82829700 | -0.3915710  | H | -2.32464000  | -2.94483000 | 1.27296800  |
| C | -3.31542900 | -0.39111600 | -0.6090040  | H | -2.36660000  | -3.42170000 | -0.4197750  |
| H | -3.43781000 | 0.62500000  | -1.00309900 | H | -0.81801400  | -3.03501400 | 0.34759600  |
| C | -4.48098500 | -1.12279700 | -0.3568580  | C | 2.76125500   | -0.08757500 | -0.25665200 |
| H | -4.35703900 | -2.13433000 | 0.04202500  | H | 3.01067600   | -1.12125800 | 0.01224000  |
| C | -1.77326600 | -2.21452900 | 0.14744200  | C | 3.82974000   | 0.77353500  | -0.42788600 |
| H | -2.26910200 | -2.97144300 | -0.4766270  | C | 5.15102900   | 0.26832900  | -0.25050500 |
| H | -0.71308400 | -2.47976700 | 0.20265700  | H | 5.23203600   | -0.79370600 | 0.01088300  |
| H | -2.19370500 | -2.32662900 | 1.15774800  | C | 6.31669900   | 0.98164300  | -0.37713400 |
| C | -5.77282800 | -0.65379900 | -0.5631990  | H | 6.25380400   | 2.04266100  | -0.63465200 |
| H | -5.86268800 | 0.36725900  | -0.95542300 | C | 3.65517200   | 2.21812600  | -0.79132300 |
| C | -6.99598500 | -1.31913700 | -0.3169690  | H | 2.60537300   | 2.49632100  | -0.92772100 |
| C | -8.19810200 | -0.65087700 | -0.5564120  | H | 4.07638700   | 2.87687700  | -0.01734100 |
| H | -8.09772800 | 0.35987800  | -0.94757300 | H | 4.18797200   | 2.46078200  | -1.72259100 |
| C | -9.47827300 | -1.21940300 | -0.3461040  | C | 7.60268500   | 0.40818600  | -0.19452500 |
| C | -7.00730300 | -2.72789600 | 0.21322900  | H | 7.61457500   | -0.65976700 | 0.05526100  |
| H | -7.60196500 | -3.39268800 | -0.4292640  | C | 8.82830000   | 1.02448500  | -0.29790700 |
| H | -6.00381500 | -3.15817400 | 0.28621300  | C | 10.01239200  | 0.23685700  | -0.07793300 |
| H | -7.46151400 | -2.7814800  | 1.21328400  | H | 9.83567000   | -0.81308800 | 0.17317500  |
| O | 15.98518300 | -2.34455100 | 1.29200300  | C | 11.29191100  | 0.6984010   | -0.11740300 |
| H | 16.82420700 | -2.01383400 | 0.88553300  | H | 11.42419100  | 1.77288400  | -0.28353900 |
| H | 15.35141000 | -0.38251400 | 1.61574100  | C | 8.98254200   | 2.47895400  | -0.62346500 |

|   |              |             |            |   |             |             |             |
|---|--------------|-------------|------------|---|-------------|-------------|-------------|
| C | -13.14172200 | -1.38007300 | -1.0359450 | H | 8.02239700  | 2.98385900  | -0.76937000 |
| C | -11.92868300 | -1.72756400 | -0.1575200 | H | 9.51867800  | 3.00859000  | 0.17864000  |
| C | -10.77733000 | -0.75272200 | -0.4647360 | H | 9.579339000 | 2.62322600  | -1.5360830  |
| C | -11.16757600 | 0.6232400   | -0.7317930 | C | 12.52009000 | -0.04342100 | 0.1390490   |
| C | -12.47076300 | 0.99610800  | -0.8787750 | C | 13.61293200 | 0.77718200  | 0.84333200  |
| C | -13.62093700 | 0.05864400  | -0.9337140 | C | 13.97208600 | -2.09492800 | 0.08857200  |
| H | -12.86544300 | -1.5769980  | -2.0963280 | C | 14.74416800 | -0.11936800 | 1.37321300  |
| H | -13.98109200 | -2.0694270  | -0.7953780 | C | 15.17387600 | -1.23582200 | 0.44781900  |
| H | -12.69773100 | 2.0601200   | -1.0004450 | H | 15.61629700 | 0.51697700  | 1.6394000   |
| C | -10.13531200 | 1.71478700  | -0.8164410 | H | 14.40043600 | -0.59971400 | 2.31608200  |
| H | -10.62112200 | 2.70022900  | -0.8374700 | C | 14.16077900 | 1.83816700  | -0.12534100 |
| H | -9.43731500  | 1.68708700  | 0.03154800 | H | 13.37628200 | 2.54453100  | -0.43051400 |
| H | -9.52171900  | 1.63524700  | -1.7250320 | H | 14.95293600 | 2.42237400  | 0.36497800  |
| C | -11.58186500 | -3.19096200 | -0.4519040 | H | 14.58442800 | 1.37811000  | -1.02298400 |
| H | -11.18825400 | -3.3169940  | -1.4701340 | C | 13.02110200 | 1.50908100  | 2.05734000  |
| H | -10.84389800 | -3.60438200 | 0.2480640  | H | 12.26527200 | 2.24958700  | 1.76305900  |
| H | -12.48690300 | -3.8078310  | -0.3603950 | H | 12.54851600 | 0.80527800  | 2.75660700  |
| C | -12.29625200 | -1.62275900 | 1.3310080  | H | 13.81555200 | 2.04116700  | 2.60048600  |
| H | -13.15743100 | -2.26512400 | 1.5695080  | C | 12.71660300 | -1.33527900 | -0.2430990  |
| H | -11.45029200 | -1.94258700 | 1.9572530  | H | 13.75762800 | -2.78784900 | 0.92906300  |
| H | -12.56701600 | -0.59819300 | 1.6081460  | C | 11.71881900 | -2.14193500 | -1.0199200  |
| O | -14.45808400 | 0.30502400  | 0.2167030  | H | 11.10618800 | -2.78555200 | -0.3680340  |
| H | -15.26393300 | -0.25423200 | 0.0870400  | H | 11.02402500 | -1.52000900 | -1.5957940  |
| O | -10.78810600 | 1.42585600  | 2.4364410  | H | 12.23777000 | -2.81864300 | -1.7140550  |
| H | -11.55468600 | 1.36273100  | 1.8269210  | H | 14.23676700 | -2.75619000 | -0.7586140  |
| K | -9.55809300  | 3.81027800  | 2.1981170  | H | -9.62460400 | -2.28288000 | 0.24083500  |
| H | -9.42028200  | -2.26170900 | -0.0279230 | K | -9.93609700 | 2.07637000  | 1.46336400  |
| H | -10.25852800 | 0.63737700  | 2.1932120  | O | 15.77955700 | -0.66390200 | -0.7145440  |
| H | -14.24011500 | 0.29584700  | -1.8725130 | H | 16.03068300 | -1.42176900 | -1.2984500  |
|   |              |             |            | H | 15.92356200 | -1.87201900 | 0.97493500  |

2

E(scf) = -2383.88567346 a.u.

|   |              |             |            |
|---|--------------|-------------|------------|
| C | -13.29884700 | -0.36503000 | 0.0722740  |
| C | -12.01503000 | -1.17088700 | 0.3426670  |
| C | -10.80820700 | -0.59958800 | -0.4202900 |
| C | -10.91086800 | 0.51565000  | -1.1989300 |
| C | -12.12136800 | 1.40552800  | -1.1845070 |
| C | -13.09466500 | 1.13058500  | -0.0589810 |
| H | -13.74979200 | -0.7121390  | -0.8848640 |
| H | -14.04208300 | -0.59304700 | 0.8684770  |
| H | -12.64941900 | 1.34232400  | -2.1561930 |
| C | -9.85777400  | 1.03082700  | -2.1271690 |
| H | -9.38602700  | 1.92958600  | -1.6805360 |
| H | -9.08938700  | 0.29371600  | -2.3812090 |
| H | -10.33491000 | 1.37427300  | -3.0590330 |
| C | -12.29450100 | -2.60882000 | -0.1275890 |
| H | -12.4150780  | -2.65494300 | -1.2186070 |
| H | -11.50077900 | -3.31081400 | 0.1594090  |
| H | -13.22694500 | -2.97064600 | 0.3289840  |
| C | -11.71116900 | -1.22598700 | 1.8480500  |
| H | -12.55312800 | -1.67713900 | 2.3930070  |
| H | -10.81969300 | -1.83752000 | 2.0475160  |
| H | -11.5398040  | -0.22632700 | 2.2655140  |
| H | -11.75280400 | 2.45092800  | -1.1142570 |
| H | -14.06977900 | 1.62031600  | -0.2830910 |
| O | -12.54726800 | 1.71860000  | 1.1350190  |
| O | -9.48402000  | 3.77416000  | -0.4308020 |
| H | -9.92706800  | 3.92154400  | -1.2832340 |
| H | -13.13804100 | 1.44798100  | 1.8831490  |
| C | -9.57391600  | -1.35659800 | -0.2605660 |

|   |             |             |             |
|---|-------------|-------------|-------------|
| C | -8.30029800 | -0.87311900 | -0.2524750  |
| H | -8.13477700 | 0.20138900  | -0.3828530  |
| C | -7.10667600 | -1.65573200 | -0.0727100  |
| C | -5.89275500 | -1.00957800 | -0.1073940  |
| H | -5.92183100 | 0.07577800  | -0.2630430  |
| C | -4.59791400 | -1.58005400 | 0.0117050   |
| H | -4.51733800 | -2.66041600 | 0.1625720   |
| C | -3.44421000 | -0.84337800 | -0.0701050  |
| H | -3.54015300 | 0.23777100  | -0.2253070  |
| C | -7.23747200 | -3.13450400 | 0.1286680   |
| H | -7.84943500 | -3.36064900 | 1.0146770   |
| H | -7.74693900 | -3.60831300 | -0.7232150  |
| H | -6.27079700 | -3.63126400 | 0.2573920   |
| C | -2.11374100 | -1.35376200 | 0.0167140   |
| C | -1.05954800 | -0.47020400 | -0.1054120  |
| H | -1.32191400 | 0.58309700  | -0.2607500  |
| C | 0.32383000  | -0.76073600 | -0.0619360  |
| H | 0.64178400  | -1.79737500 | 0.0920590   |
| C | 1.30634100  | 0.19118300  | -0.2074600  |
| H | 0.98809100  | 1.22744900  | -0.3632580  |
| C | -1.92023200 | -2.82541700 | 0.22891600  |
| H | -2.37941900 | -3.15337000 | 1.17291700  |
| H | -2.40675100 | -3.40617600 | -0.5681370  |
| H | -0.86531700 | -3.11508900 | 0.25424200  |
| C | 2.68995200  | -0.09939000 | -0.16978500 |
| H | 2.95319700  | -1.15166400 | -0.00902600 |
| C | 3.74304100  | 0.78218800  | -0.31210200 |
| C | 5.07463800  | 0.27139100  | -0.24027100 |
| H | 5.17197800  | -0.80718100 | -0.06877000 |
| C | 6.22674400  | 1.00377500  | -0.36365500 |
| H | 6.14418900  | 2.08062200  | -0.53714100 |
| C | 3.54787000  | 2.25145500  | -0.53826600 |
| H | 2.49303500  | 2.54220200  | -0.55040000 |
| H | 4.04778600  | 2.84078200  | 0.24405600  |
| H | 3.99228200  | 2.56779600  | -1.49325600 |
| C | 7.52426400  | 0.43294900  | -0.27057800 |
| H | 7.55623300  | -0.64804600 | -0.08872000 |
| C | 8.73685400  | 1.07263300  | -0.37486700 |
| C | 9.93662800  | 0.29109400  | -0.22330900 |
| H | 9.78088500  | -0.77255000 | -0.02139500 |
| C | 11.20629300 | 0.77768900  | -0.25813900 |
| H | 11.31699700 | 1.86137600  | -0.37488300 |
| C | 8.86297300  | 2.54445200  | -0.62376900 |
| H | 7.89341800  | 3.0403380   | -0.73235400 |
| H | 9.40099600  | 3.03971100  | 0.1986490   |
| H | 9.44567000  | 2.74494800  | -1.5346590  |
| C | 12.45232200 | 0.0520350   | -0.0528630  |
| C | 13.53965000 | 0.86244300  | 0.6730000   |
| C | 13.97097100 | -1.94089100 | -0.2524490  |
| C | 14.64862100 | -0.05749400 | 1.19967900  |
| C | 15.12992400 | -1.05183200 | 0.16452200  |
| H | 15.49841000 | 0.56143500  | 1.56215800  |
| H | 14.26353400 | -0.62794500 | 2.07773000  |
| C | 14.13051300 | 1.89960000  | -0.29414300 |
| H | 13.35471100 | 2.57356300  | -0.68323000 |
| H | 14.87864600 | 2.51972300  | 0.22048800  |
| H | 14.61734100 | 1.42235500  | -1.15447200 |
| C | 12.94734000 | 1.60609900  | 1.87723800  |
| H | 12.21398600 | 2.36645300  | 1.57735500  |
| H | 12.44834300 | 0.91179400  | 2.5673790   |

|   |             |             |            |
|---|-------------|-------------|------------|
| H | 13.74714200 | 2.11681800  | 2.43213100 |
| C | 12.67726800 | -1.21379200 | -0.5028080 |
| H | 13.80622500 | -2.69573900 | 0.54780200 |
| C | 11.68331300 | -2.01193100 | -1.2930470 |
| H | 11.09363800 | -2.68736800 | -0.6526240 |
| H | 10.96715200 | -1.38363100 | -1.8352660 |
| H | 12.20219800 | -2.65407900 | -2.0185710 |
| O | 16.24231600 | -1.81977600 | 0.62141000 |
| H | 15.51431700 | -0.50991600 | -0.7271350 |
| H | 15.93164700 | -2.29504700 | 1.43347500 |
| H | 14.24540800 | -2.53024900 | -1.1468610 |
| H | -9.69378500 | -2.42336400 | -0.0479190 |
| K | -9.86606400 | 2.16552400  | 1.41741900 |

**Table S6.** Oxidation reaction mechanism enthalpy and free energy values (Scheme S1).

| Pathway 1              | $\Delta H$     | $\Delta G$     | Pathway 2      | $\Delta H$     | $\Delta G$     |
|------------------------|----------------|----------------|----------------|----------------|----------------|
| <b>I</b>               | 2,45           | -3,91          | <b>I</b>       | 2,45           | -3,91          |
| <b>II</b>              | -36,12         | -29,67         | <b>II</b>      | -36,12         | -29,67         |
| <b>III<sub>1</sub></b> | 1,28           | -3,54          | <b>III</b>     | -9,11          | -13,94         |
| <b>IV<sub>1</sub></b>  | -35,31         | -28,08         | <b>IV</b>      | -16,37         | -20,60         |
| <b>V<sub>1</sub></b>   | -10,79         | -16,16         | <b>V</b>       | 0,72           | -4,76          |
| <b>VI<sub>1</sub></b>  | -14,69         | -19,59         | <b>VI</b>      | -34,75         | -28,07         |
| <b>VII</b>             | -11,60         | -17,03         | <b>VII</b>     | -11,60         | -17,03         |
| <b>3</b>               | -18,48         | -23,18         | <b>3</b>       | -18,48         | -23,18         |
| <b>Total =</b>         | <b>-123,26</b> | <b>-141,16</b> | <b>Total =</b> | <b>-123,26</b> | <b>-141,16</b> |

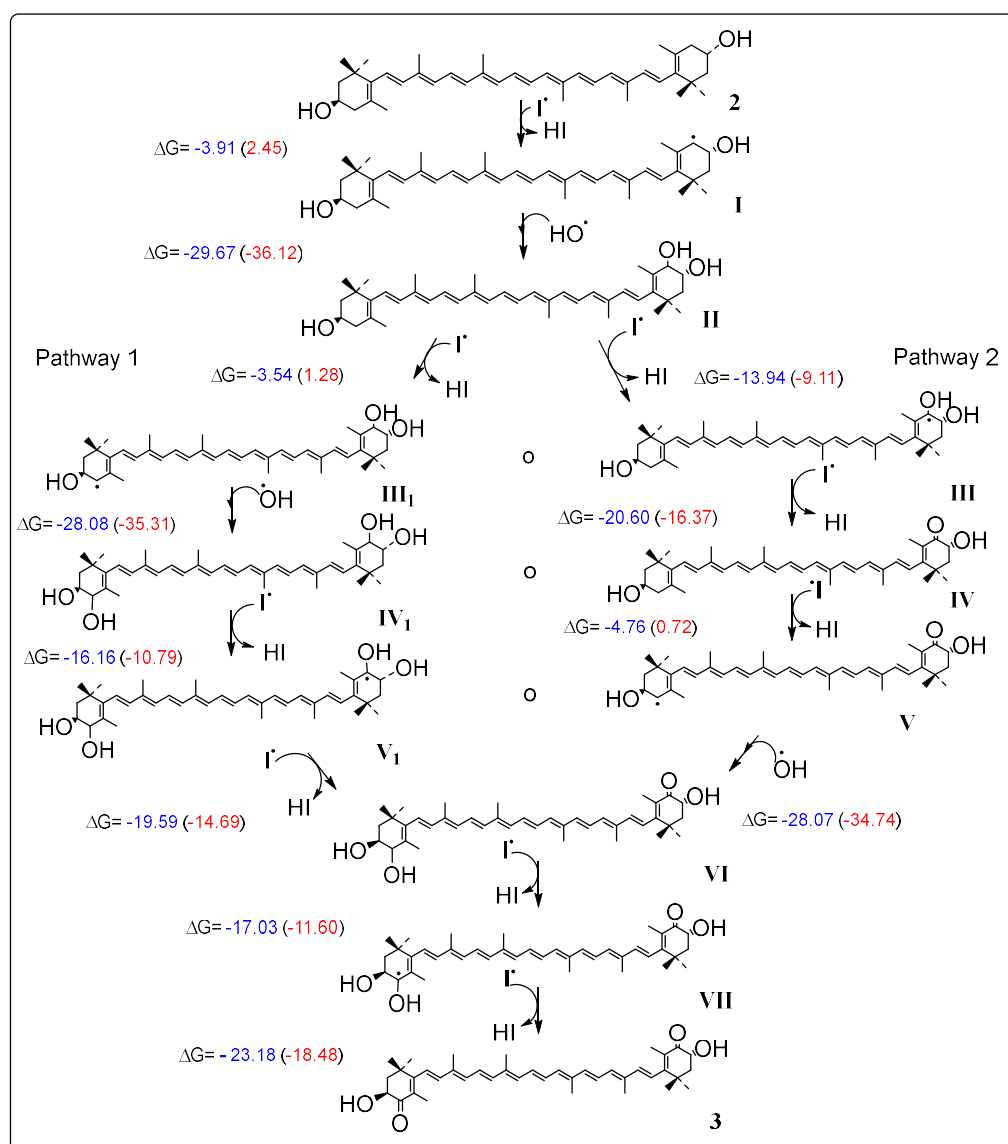

**Scheme S1.** Possible pathways for the allylic oxidation of 2 to 3.

**Table S7.** Cartesian coordinates (xyz) for the optimized geometries involved in the oxidation reaction mechanism calculated at the (PCM:1-butanol)M06-L/6-311+G(2d)//M06-L/6-31G(d) level.

| 2                            |              |              | I                           |   |              |              |             |
|------------------------------|--------------|--------------|-----------------------------|---|--------------|--------------|-------------|
| E(scf) = -1708.05727324 a.u. |              |              | E(scf) = -1707.43842737a.u. |   |              |              |             |
| C                            | 14.065214000 | -0.457466000 | 0.520507000                 | C | 13.876730000 | 0.098320000  | -1.02193900 |
| C                            | 12.78997600  | 0.354519000  | 0.796002000                 | C | 12.954400000 | 0.800519000  | -0.01266300 |
| C                            | 11.67304100  | 0.004001000  | -0.195403000                | C | 11.652642000 | -0.004086000 | 0.06951600  |
| C                            | 11.78000400  | -1.032307000 | -1.068227000                | C | 11.826628000 | -1.447943000 | 0.20246000  |
| C                            | 12.95014600  | -1.973330000 | -1.081155000                | C | 13.014566000 | -2.036528000 | -0.08166800 |
| C                            | 13.83242200  | -1.909352000 | 0.146241000                 | C | 14.192274000 | -1.350388000 | -0.67622400 |
| H                            | 14.61454900  | 0.008322000  | -0.312911000                | H | 13.393952000 | 0.131202000  | -2.01084600 |
| H                            | 14.73196600  | -0.382906000 | 1.395057000                 | H | 14.816713000 | 0.663985000  | -1.11743200 |
| H                            | 13.56073900  | -1.784514000 | -1.980270000                | C | 10.727278000 | -2.324502000 | 0.73534200  |
| C                            | 10.78866500  | -1.334764000 | -2.149322000                | H | 10.168532000 | -1.838533000 | 1.54332000  |
| H                            | 10.12728200  | -2.171486000 | -1.879010000                | H | 9.998707000  | -2.596855000 | -0.03943200 |
| H                            | 10.15230300  | -0.480955000 | -2.399883000                | H | 11.142972000 | -3.262119000 | 1.12022000  |
| H                            | 11.31514600  | -1.653158000 | -3.060989000                | C | 12.761357000 | 2.236998000  | -0.49946500 |
| C                            | 13.18545000  | 1.835104000  | 0.679111000                 | H | 12.212921000 | 2.280003000  | -1.44931800 |
| H                            | 13.42021600  | 2.109364000  | -0.357352000                | H | 12.227943000 | 2.858930000  | 0.22974400  |
| H                            | 12.40349400  | 2.511417000  | 1.042889000                 | H | 13.741629000 | 2.704884000  | -0.65609100 |
| H                            | 14.07941900  | 2.028373000  | 1.287001000                 | C | 13.608116000 | 0.852763000  | 1.37788600  |
| C                            | 12.28158200  | 0.109827000  | 2.224908000                 | H | 14.578205000 | 1.365929000  | 1.32669500  |
| H                            | 13.06378300  | 0.344762000  | 2.961344000                 | H | 12.968223000 | 1.408792000  | 2.07537900  |
| H                            | 11.41780400  | 0.750911000  | 2.442719000                 | H | 13.785876000 | -0.145255000 | 1.78743700  |
| H                            | 11.97040200  | -0.929969000 | 2.361738000                 | H | 13.143072000 | -3.099595000 | 0.12708900  |
| H                            | 12.58297800  | -3.004618000 | -1.195753000                | H | 14.468487000 | -1.882031000 | -1.60780100 |
| H                            | 14.80516100  | -2.38129800  | -0.085371000                | O | 15.270736000 | -1.486388000 | 0.25615800  |
| O                            | 13.17744400  | -2.65648600  | 1.167228000                 | H | 16.064607000 | -1.148976000 | -0.18280900 |
| H                            | 13.68368200  | -2.53208300  | 1.982581000                 | C | 10.446942000 | 0.663403000  | 0.09673100  |
| C                            | 10.48956600  | 0.84953900   | -0.107928000                | C | 9.112682000  | 0.190038000  | 0.06330300  |
| C                            | 9.19572100   | 0.44880900   | -0.215161000                | H | 8.919754000  | -0.871825000 | -0.06823000 |
| H                            | 8.99059200   | -0.61187900  | -0.375668000                | C | 7.989114000  | 1.006013000  | 0.13637600  |
| C                            | 8.03944900   | 1.29490100   | -0.097344000                | C | 6.714306000  | 0.403680000  | 0.03554700  |
| C                            | 6.79523200   | 0.72104500   | -0.189438000                | H | 6.715687000  | -0.681567000 | -0.10634800 |
| H                            | 6.77054100   | -0.36123400  | -0.349412000                | C | 5.470798000  | 1.012654000  | 0.09568700  |
| C                            | 5.52796300   | 1.35372500   | -0.102582000                | H | 5.418857000  | 2.092163000  | 0.24681900  |
| H                            | 5.49628300   | 2.43376300   | 0.050656000                 | C | 4.263349000  | 0.318931000  | -0.02640100 |
| C                            | 4.34241500   | 0.67542600   | -0.200411000                | H | 4.324414000  | -0.761325000 | -0.18689600 |
| H                            | 4.39161300   | -0.40732100  | -0.349248000                | C | 8.137341000  | 2.490167000  | 0.31740500  |
| C                            | 8.24643200   | 2.76060100   | 0.127775000                 | H | 8.713201000  | 2.729203000  | 1.22002600  |
| H                            | 8.78849700   | 2.94339400   | 1.066166000                 | H | 8.673187000  | 2.944031000  | -0.52663300 |
| H                            | 8.85597700   | 3.20235200   | -0.671751000                | H | 7.175972000  | 3.002768000  | 0.40078300  |
| H                            | 7.30867300   | 3.31981700   | 0.176678000                 | C | 2.980938000  | 0.877331000  | 0.04027300  |
| C                            | 3.03498100   | 1.24066800   | -0.123723000                | C | 1.870370000  | 0.035422000  | -0.11016600 |
| C                            | 1.94571100   | 0.40210500   | -0.231914000                | H | 2.093734000  | -1.021055000 | -0.28765000 |
| H                            | 2.16588000   | -0.66033000  | -0.374217000                | C | 0.519794000  | 0.377945000  | -0.06133200 |
| C                            | 0.57442100   | 0.73861000   | -0.179964000                | H | 0.241548000  | 1.417544000  | 0.12722600  |
| H                            | 0.29186400   | 1.78473000   | -0.040020000                | C | -0.519172000 | -0.528739000 | -0.23697800 |
| C                            | -0.43819000  | -0.18284000  | -0.292095000                | H | -0.245469000 | -1.567932000 | -0.43366700 |
| H                            | -0.14829000  | -1.22716600  | -0.429693000                | C | 2.831306000  | 2.353349000  | 0.27001900  |
| C                            | 2.90344900   | 2.72012400   | 0.074262000                 | H | 3.273017000  | 2.655252000  | 1.22853500  |
| H                            | 3.36934700   | 3.03715900   | 1.016942000                 | H | 3.345974000  | 2.929945000  | -0.50935500 |
| H                            | 3.41280700   | 3.27249700   | -0.726467000                | H | 1.787794000  | 2.677009000  | 0.27545700  |
| H                            | 1.86341200   | 3.05482300   | 0.093130000                 | C | -1.872891000 | -0.180228000 | -0.17681600 |
| C                            | -1.81311100  | 0.13762500   | -0.237813000                | H | -2.086785000 | 0.872149000  | 0.03397900  |
| H                            | -2.05020100  | 1.19724600   | -0.102352000                | C | -2.980871000 | -1.003631000 | -0.35084800 |
| C                            | -2.88655700  | -0.72331400  | -0.330381000                | C | -4.273757000 | -0.436719000 | -0.23491900 |
| C                            | -4.20757800  | -0.19052700  | -0.246175000                | H | -4.316738000 | 0.630997000  | -0.00010700 |

|   |              |              |              |   |               |              |             |
|---|--------------|--------------|--------------|---|---------------|--------------|-------------|
| H | -4.286796000 | 0.89265200   | -0.11521500  | C | -5.471300000  | -1.099691000 | -0.38513400 |
| C | -5.36994400  | -0.91159000  | -0.30912400  | H | -5.445163000  | -2.163579000 | -0.62613300 |
| H | -5.29698000  | -1.99266200  | -0.43701600  | C | -2.853960000  | -2.465610000 | -0.65623300 |
| C | -2.72487900  | -2.20219000  | -0.51306600  | H | -1.814919000  | -2.801319000 | -0.69788800 |
| H | -1.67885900  | -2.51559500  | -0.54456000  | H | -3.366583000  | -3.074477000 | 0.10018200  |
| H | -3.20915400  | -2.75589700  | 0.30216500   | H | -3.316761000  | -2.711244000 | -1.62147100 |
| H | -3.19882000  | -2.54042900  | -1.444201000 | C | -6.729755000  | -0.473585000 | -0.23953100 |
| C | -6.66319100  | -0.33579200  | -0.209908000 | H | -6.702303000  | 0.591257000  | 0.01158700  |
| H | -6.69049000  | 0.75103100   | -0.085244000 | C | -7.980904000  | -1.037106000 | -0.36874800 |
| C | -7.87615600  | -0.97846100  | -0.244818000 | C | -9.132041000  | -0.207473000 | -0.15369600 |
| C | -9.07714000  | -0.19782200  | -0.109040000 | H | -8.921333000  | 0.829320000  | 0.11622300  |
| H | -8.9321000   | 0.87786100   | 0.011484000  | C | -10.428051000 | -0.619258000 | -0.20684800 |
| C | -10.34024800 | -0.696248000 | -0.07250600  | H | -10.599897000 | -1.682980000 | -0.39122300 |
| H | -10.44189300 | -1.784088000 | -0.10186800  | C | -8.189437000  | -2.480128000 | -0.70960000 |
| C | -8.00691400  | -2.461618000 | -0.40630500  | H | -7.251665000  | -3.019289000 | -0.86557500 |
| H | -7.04381900  | -2.963194000 | -0.527637000 | H | -8.739360000  | -2.999105000 | 0.08787400  |
| H | -8.5049700   | -2.912312000 | 0.463660000  | H | -8.790239000  | -2.590633000 | -1.62204900 |
| H | -8.62367900  | -2.712610000 | -1.279352000 | C | -11.625121000 | 0.162259000  | 0.06512500  |
| C | -11.5876200  | 0.032806000  | 0.112352000  | C | -12.733829000 | -0.622567000 | 0.78175300  |
| C | -12.6148410  | -0.702735000 | 0.984399000  | C | -13.000479000 | 2.261041000  | 0.04006500  |
| C | -13.1267240  | 1.984890000  | -0.218261000 | C | -13.823891000 | 0.311917000  | 1.32908300  |
| C | -13.78157500 | 0.214878000  | 1.382770000  | C | -14.226563000 | 1.438600000  | 0.40480800  |
| C | -14.27885200 | 1.130907000  | 0.287701000  | H | -14.707490000 | -0.282854000 | 1.59993700  |
| H | -14.61100800 | -0.398914000 | 1.761002000  | H | -13.460420000 | 0.773798000  | 2.25962600  |
| H | -13.46241100 | 0.857018000  | 2.217991000  | C | -13.339828000 | -1.656138000 | -0.18096000 |
| C | -13.13816800 | -1.942342000 | 0.240747000  | H | -12.589157000 | -2.388204000 | -0.50517100 |
| H | -12.33370500 | -2.661553000 | 0.040726000  | H | -14.138850000 | -2.216076000 | 0.32339500  |
| H | -13.88571300 | -2.460595000 | 0.856470000  | H | -13.768840000 | -1.177583000 | -1.06414200 |
| H | -13.61065600 | -1.670377000 | -0.705803000 | C | -12.149703000 | -1.374024000 | 1.98665400  |
| C | -11.95213700 | -1.169959000 | 2.288181000  | H | -11.424248000 | -2.138041000 | 1.68218100  |
| H | -11.16582100 | -1.912553000 | 2.106819000  | H | -11.640182000 | -0.689931000 | 2.67735100  |
| H | -11.49669600 | -0.330604000 | 2.829229000  | H | -12.950832000 | -1.880515000 | 2.54170100  |
| H | -12.69890800 | -1.632262000 | 2.947868000  | C | -11.776886000 | 1.460419000  | -0.31065200 |
| C | -11.84474600 | 1.237297000  | -0.462586000 | H | -12.761322000 | 2.940041000  | 0.87792700  |
| H | -12.94316500 | 2.801361000  | 0.502658000  | C | -10.762490000 | 2.229717000  | -1.10078200 |
| C | -10.90276300 | 1.944542000  | -1.388167000 | H | -10.135792000 | 2.871821000  | -0.46269400 |
| H | -10.33498800 | 2.737362000  | -0.877076000 | H | -10.086764000 | 1.581189000  | -1.66676800 |
| H | -10.17259100 | 1.271211000  | -1.847371000 | H | -11.263106000 | 2.905698000  | -1.80776600 |
| H | -11.46093900 | 2.445596000  | -2.191394000 | H | -13.247664000 | 2.937830000  | -0.79496300 |
| H | -13.43093200 | 2.503072000  | -1.143403000 | H | 10.523023000  | 1.749667000  | 0.10670400  |
| H | 10.66437900  | 1.898799000  | 0.140190000  | O | -14.848825000 | 0.869512000  | -0.74115800 |
| O | -14.84083000 | 0.325565000  | -0.741496000 | H | -15.051575000 | 1.594373000  | -1.34805600 |
| H | -15.08150600 | 0.914644000  | -1.469368000 | H | -14.949863000 | 2.089287000  | 0.93054700  |
| H | -15.05964000 | 1.794638000  | 0.704035000  |   |               |              |             |

## II

E(scf) = -1783.25802236 a.u.

|   |              |              |             |
|---|--------------|--------------|-------------|
| C | 13.751843000 | -0.253161000 | 0.47745200  |
| C | 12.489284000 | 0.579604000  | 0.74091600  |
| C | 11.326391000 | 0.130101000  | -0.15073600 |
| C | 11.400531000 | -0.965515000 | -0.95117900 |
| C | 12.575921000 | -1.901413000 | -0.93766600 |
| C | 13.495253000 | -1.728422000 | 0.26198600  |
| H | 14.239559000 | 0.109940000  | -0.43920300 |
| H | 14.471358000 | -0.090580000 | 1.29595900  |
| C | 10.373704000 | -1.356264000 | -1.96853000 |
| H | 9.713917000  | -2.159580000 | -1.60694800 |
| H | 9.735564000  | -0.520060000 | -2.26849000 |
| H | 10.881789000 | -1.744491000 | -2.86021500 |
| C | 12.864806000 | 2.040207000  | 0.44431300  |

## III<sub>1</sub>

E(scf) = -1782.64060457a.u.

|   |              |              |            |
|---|--------------|--------------|------------|
| C | 13.776713000 | -0.159677000 | 0.3163750  |
| C | 12.511186000 | 0.673853000  | 0.5649990  |
| C | 11.312609000 | 0.119289000  | -0.2141070 |
| C | 11.370478000 | -1.048251000 | -0.9089170 |
| C | 12.568576000 | -1.955302000 | -0.8707620 |
| C | 13.542090000 | -1.652853000 | 0.2582680  |
| H | 14.207843000 | 0.119640000  | -0.6562430 |
| H | 14.533195000 | 0.094936000  | 1.0757220  |
| C | 10.303624000 | -1.556905000 | -1.8281370 |
| H | 9.680092000  | -2.329450000 | -1.3530420 |
| H | 9.633217000  | -0.766950000 | -2.1790290 |
| H | 10.775637000 | -2.026416000 | -2.7003250 |
| C | 12.840560000 | 2.104232000  | 0.1081230  |
| H | 12.967879000 | 2.158594000  | -0.9802290 |

|   |               |              |             |   |               |              |            |
|---|---------------|--------------|-------------|---|---------------|--------------|------------|
| H | 13.054851000  | 2.195922000  | -0.62502100 | H | 12.072722000  | 2.829742000  | 0.4004600  |
| H | 12.091308000  | 2.748975000  | 0.76176300  | H | 13.780028000  | 2.432118000  | 0.5726440  |
| H | 13.780884000  | 2.303824000  | 0.98954100  | C | 12.160587000  | 0.718614000  | 2.0596010  |
| C | 12.057765000  | 0.485245000  | 2.21217500  | H | 13.008291000  | 1.102317000  | 2.6452250  |
| H | 12.880972000  | 0.781919000  | 2.87800200  | H | 11.306968000  | 1.385213000  | 2.2374900  |
| H | 11.212064000  | 1.155554000  | 2.41212600  | H | 11.892437000  | -0.273480000 | 2.4351200  |
| H | 11.744173000  | -0.530998000 | 2.46935400  | H | 14.498147000  | -2.160176000 | 0.0219210  |
| H | 14.453560000  | -2.231397000 | 0.02541400  | O | 12.983616000  | -2.206196000 | 1.4417700  |
| O | 12.868052000  | -2.380133000 | 1.35775100  | H | 13.53358700   | -1.915036000 | 2.18230900 |
| H | 13.374710000  | -2.159123000 | 2.15146400  | C | 10.113015000  | 0.940592000  | -0.1499340 |
| C | 10.135441000  | 0.965724000  | -0.06972300 | C | 8.824316000   | 0.503482000  | -0.1069310 |
| C | 8.846264000   | 0.537859000  | -0.09703500 | H | 8.637727000   | -0.572102000 | -0.1014600 |
| H | 8.655473000   | -0.534501000 | -0.17542500 | C | 7.660110000   | 1.337711000  | -0.0407530 |
| C | 7.679357000   | 1.371737000  | -0.00225500 | C | 6.421845000   | 0.734901000  | 0.0199420  |
| C | 6.444580000   | 0.771275000  | -0.01344400 | H | 6.416714000   | -0.359397000 | 0.0282740  |
| H | 6.436672000   | -0.320675000 | -0.08365100 | C | 5.151781000   | 1.352315000  | 0.0595920  |
| C | 5.167784000   | 1.387714000  | 0.04602300  | H | 5.100934000   | 2.442208000  | 0.0361500  |
| H | 5.118098000   | 2.476491000  | 0.10103800  | C | 3.969335000   | 0.648060000  | 0.1148490  |
| C | 3.993397000   | 0.683567000  | 0.03079400  | H | 4.035353000   | -0.443558000 | 0.1428400  |
| H | 4.059313000   | -0.407261000 | -0.01892700 | C | 7.841586000   | 2.823782000  | -0.0486110 |
| C | 7.866302000   | 2.853683000  | 0.09806700  | H | 8.437450000   | 3.152141000  | 0.8143130  |
| H | 8.450330000   | 3.118548000  | 0.99038000  | H | 8.386949000   | 3.151912000  | -0.9434180 |
| H | 8.426052000   | 3.241329000  | -0.76356900 | H | 6.894629000   | 3.368521000  | -0.0187150 |
| H | 6.920612000   | 3.398946000  | 0.15195400  | C | 2.665896000   | 1.201879000  | 0.1304830  |
| C | 2.677903000   | 1.233904000  | 0.07007600  | C | 1.574509000   | 0.340037000  | 0.1841050  |
| C | 1.600778000   | 0.372993000  | 0.05506700  | H | 1.809805000   | -0.727942000 | 0.2244360  |
| H | 1.836205000   | -0.695001000 | 0.02031300  | C | 0.214666000   | 0.667514000  | 0.1859300  |
| C | 0.225327000   | 0.694649000  | 0.07672300  | H | -0.079866000  | 1.718358000  | 0.1357210  |
| H | -0.070404000  | 1.746000000  | 0.10171200  | C | -0.807469000  | -0.273288000 | 0.2436210  |
| C | -0.777030000  | -0.244338000 | 0.06416300  | H | -0.510466000  | -1.323182000 | 0.3004950  |
| H | -0.477398000  | -1.294619000 | 0.04222800  | C | 2.510981000   | 2.691906000  | 0.0786340  |
| C | 2.526180000   | 2.723519000  | 0.12557900  | H | 3.031036000   | 3.174506000  | 0.9166090  |
| H | 2.998249000   | 3.135705000  | 1.02760700  | H | 2.949395000   | 3.104371000  | -0.8399460 |
| H | 3.018059000   | 3.204016000  | -0.73055700 | H | 1.466828000   | 3.011671000  | 0.1155620  |
| H | 1.481734000   | 3.044477000  | 0.12669500  | C | -2.163397000  | 0.049030000  | 0.2256320  |
| C | -2.154410000  | 0.069238000  | 0.07411000  | H | -2.404452000  | 1.114166000  | 0.1556340  |
| H | -2.398859000  | 1.135607000  | 0.08855800  | C | -3.260607000  | -0.821780000 | 0.2799640  |
| C | -3.223100000  | -0.802290000 | 0.06224900  | C | -4.550987000  | -0.281637000 | 0.2236520  |
| C | -4.546024000  | -0.267737000 | 0.06015900  | H | -4.628251000  | 0.805502000  | 0.1321640  |
| H | -4.627998000  | 0.823121000  | 0.06928300  | C | -5.748609000  | -1.001724000 | 0.2670060  |
| C | -5.707964000  | -0.992066000 | 0.04189000  | H | -5.682243000  | -2.086234000 | 0.3686870  |
| H | -5.636165000  | -2.080934000 | 0.03323800  | C | -3.088825000  | -2.308584000 | 0.3957770  |
| C | -3.055342000  | -2.291303000 | 0.04579000  | H | -2.040429000  | -2.615954000 | 0.3862480  |
| H | -2.008157000  | -2.602315000 | 0.05977300  | H | -3.531009000  | -2.688130000 | 1.3262680  |
| H | -3.547333000  | -2.754169000 | 0.91160300  | H | -3.590119000  | -2.833106000 | -0.4275670 |
| H | -3.518196000  | -2.731783000 | -0.84748900 | C | -6.998788000  | -0.410371000 | 0.1793390  |
| C | -6.999302000  | -0.403531000 | 0.02647600  | H | -7.011384000  | 0.678019000  | 0.0646780  |
| H | -7.020126000  | 0.690583000  | 0.02978900  | C | -8.267662000  | -1.033385000 | 0.2077190  |
| C | -8.216866000  | -1.037556000 | 0.00031200  | C | -9.395823000  | -0.233977000 | 0.0625020  |
| C | -9.411066000  | -0.235931000 | -0.02397400 | H | -9.207575000  | 0.830316000  | -0.0541290 |
| H | -9.255090000  | 0.844573000  | -0.00355800 | C | -10.728406000 | -0.711262000 | 0.1012570  |
| C | -10.682870000 | -0.713679000 | -0.03074200 | H | -10.804848000 | -1.771226000 | 0.3402110  |
| H | -10.804102000 | -1.797594000 | 0.03995600  | C | -8.401875000  | -2.519438000 | 0.3820160  |
| C | -8.360472000  | -2.527748000 | -0.00223500 | H | -7.436312000  | -3.018625000 | 0.4938930  |
| H | -7.399964000  | -3.048864000 | 0.00630800  | H | -8.996273000  | -2.764812000 | 1.2716480  |
| H | -8.928996000  | -2.869220000 | 0.87404700  | H | -8.911373000  | -2.981114000 | -0.4730920 |
| H | -8.917671000  | -2.870834000 | -0.88408400 | C | -11.934163000 | -0.063722000 | -0.0634920 |
| C | -11.926582000 | 0.043880000  | -0.02091400 | C | -13.240881000 | -0.833939000 | 0.1562400  |
| C | -13.041211000 | -0.601885000 | 0.81442800  | C | -13.295031000 | 1.944527000  | -0.4021450 |
| C | -13.393892000 | 1.978205000  | -0.65302700 | C | -14.200963000 | 0.067358000  | 0.9510110  |



|   |               |              |             |   |               |              |            |
|---|---------------|--------------|-------------|---|---------------|--------------|------------|
| C | -14.213236000 | 0.367659000  | 1.04032000  | C | -14.495015000 | 1.400529000  | 0.2938820  |
| C | -14.601344000 | 1.192930000  | -0.16548000 | H | -15.153246000 | -0.454709000 | 1.1148200  |
| H | -15.083905000 | -0.195924000 | 1.40339000  | H | -13.761594000 | 0.251395000  | 1.9421980  |
| H | -13.941702000 | 1.073723000  | 1.83971900  | C | -13.841270000 | -1.203597000 | -1.2099510 |
| C | -13.529280000 | -1.886215000 | 0.12457300  | H | -13.179889000 | -1.904541000 | -1.7359430 |
| H | -12.726336000 | -2.630920000 | 0.05089900  | H | -14.820083000 | -1.683561000 | -1.0825240 |
| H | -14.338481000 | -2.342575000 | 0.71043900  | H | -13.990669000 | -0.324404000 | -1.8421270 |
| H | -13.912666000 | -1.681304000 | -0.87748600 | C | -13.068919000 | -2.121914000 | 0.9611490  |
| C | -12.502448000 | -0.978683000 | 2.20199300  | H | -12.513102000 | -2.890466000 | 0.4103310  |
| H | -11.720922000 | -1.746133000 | 2.14375200  | H | -12.553486000 | -1.945658000 | 1.9140590  |
| H | -12.074671000 | -0.108443000 | 2.71636600  | H | -14.055531000 | -2.546271000 | 1.1859410  |
| H | -13.312183000 | -1.377579000 | 2.82797700  | C | -12.101039000 | 1.312157000  | -0.5257970 |
| C | -12.111353000 | 1.195410000  | -0.71884300 | C | -10.989738000 | 2.051914000  | -1.2182620 |
| H | -13.250971000 | 2.857450000  | -0.00003800 | H | -10.273336000 | 2.487836000  | -0.5101590 |
| C | -11.081581000 | 1.807296000  | -1.61918400 | H | -10.419637000 | 1.402941000  | -1.8930330 |
| H | -10.531759000 | 2.624920000  | -1.12805800 | H | -11.395694000 | 2.883530000  | -1.8052070 |
| H | -10.337712000 | 1.083926000  | -1.96691600 | H | -13.393468000 | 2.948938000  | -0.8247750 |
| H | -11.562737000 | 2.255678000  | -2.99607000 | H | 10.273259000  | 2.016992000  | -0.0626170 |
| H | -13.611334000 | 2.409052000  | -1.64492100 | O | -15.595039000 | 1.208825000  | -0.6093130 |
| H | 10.303891000  | 2.031719000  | 0.09679900  | H | -15.654826000 | 2.001678000  | -1.1606460 |
| O | -15.104230000 | 0.310384000  | -1.16141800 | H | -14.810944000 | 2.120452000  | 1.0732090  |
| H | -15.295878000 | 0.841317000  | -1.94634300 | O | 13.227114000  | -1.845263000 | -2.1356530 |
| H | -15.394682000 | 1.904542000  | 0.12956900  | H | 13.823288000  | -2.603776000 | -2.2122180 |
| O | 13.301511000  | -1.693902000 | -2.15286800 | H | 12.201170000  | -2.989141000 | -0.7264710 |
| H | 13.882446000  | -2.459020000 | -2.27049300 |   |               |              |            |
| H | 12.181255000  | -2.934724000 | -0.90775400 |   |               |              |            |

IV<sub>1</sub>

E(scf) = -1858.45883268 a.u.

|   |              |              |             |
|---|--------------|--------------|-------------|
| C | 13.981261000 | -0.096850000 | 1.00384000  |
| C | 12.706879000 | 0.758837000  | 0.94772300  |
| C | 11.650215000 | 0.132602000  | 0.03000600  |
| C | 11.816280000 | -1.084226000 | -0.55142100 |
| C | 12.975427000 | -1.983915000 | -0.22841000 |
| C | 13.731021000 | -1.588263000 | 1.03100300  |
| H | 14.587184000 | 0.095440000  | 0.10624800  |
| H | 14.592739000 | 0.219639000  | 1.86392100  |
| C | 10.913969000 | -1.664485000 | -1.59557800 |
| H | 10.216595000 | -2.406770000 | -1.17822900 |
| H | 10.315642000 | -0.904532000 | -2.10702500 |
| H | 11.521704000 | -2.190097000 | -2.34295400 |
| C | 13.133257000 | 2.136900000  | 0.41720900  |
| H | 13.454586000 | 2.081264000  | -0.63015300 |
| H | 12.335586000 | 2.884852000  | 0.49147900  |
| H | 13.978674000 | 2.513679000  | 1.00820100  |
| C | 12.106102000 | 0.949178000  | 2.34856200  |
| H | 12.850543000 | 1.375193000  | 3.03621500  |
| H | 11.253222000 | 1.639223000  | 2.31505000  |
| H | 11.747517000 | 0.000243000  | 2.75856600  |
| H | 14.703291000 | -2.119106000 | 1.02104200  |
| O | 12.950543000 | -2.031190000 | 2.13240900  |
| H | 13.355022000 | -1.673430000 | 2.93499700  |
| C | 10.454412000 | 0.944351000  | -0.15172400 |
| C | 9.174800000  | 0.497786000  | -0.25089100 |
| H | 8.991173000  | -0.577704000 | -0.21077800 |
| C | 8.002893000  | 1.324276000  | -0.34862300 |
| C | 6.773260000  | 0.713998000  | -0.38944800 |
| H | 6.772791000  | -0.379921000 | -0.36306400 |
| C | 5.493546000  | 1.324138000  | -0.44866500 |
| H | 5.437812000  | 2.413978000  | -0.45791000 |
| C | 4.322435000  | 0.614999000  | -0.48155200 |

V<sub>1</sub>

E(scf) = -1857.86172744 a.u.

|   |              |              |             |
|---|--------------|--------------|-------------|
| C | 13.997507000 | 0.008034000  | 0.84497000  |
| C | 12.712027000 | 0.848248000  | 0.81169200  |
| C | 11.630506000 | 0.188692000  | -0.05251600 |
| C | 11.792068000 | -1.040183000 | -0.61149500 |
| C | 12.976295000 | -1.915273000 | -0.31321800 |
| C | 13.765882000 | -1.484927000 | 0.91321300  |
| H | 14.571898000 | 0.185794000  | -0.07609200 |
| H | 14.632659000 | 0.350611000  | 1.67747300  |
| C | 10.862150000 | -1.657423000 | -1.60922600 |
| H | 10.189715000 | -2.397955000 | -1.14996800 |
| H | 10.236375000 | -0.918829000 | -2.11905600 |
| H | 11.451436000 | -2.193985000 | -2.36366700 |
| C | 13.103622000 | 2.218005000  | 0.23504500  |
| H | 13.389283000 | 2.141118000  | -0.82127700 |
| H | 12.299901000 | 2.958319000  | 0.31971000  |
| H | 13.964203000 | 2.618516000  | 0.78747000  |
| C | 12.158341000 | 1.065337000  | 2.22813500  |
| H | 12.921866000 | 1.514044000  | 2.87954800  |
| H | 11.297572000 | 1.745975000  | 2.20889200  |
| H | 11.824168000 | 0.122679000  | 2.67209300  |
| H | 14.743747000 | -2.005095000 | 0.88476700  |
| O | 13.024625000 | -1.911934000 | 2.04727400  |
| H | 13.445780000 | -1.527183000 | 2.82845400  |
| C | 10.419324000 | 0.980074000  | -0.21025000 |
| C | 9.141284000  | 0.513145000  | -0.26052400 |
| H | 8.976031000  | -0.563665000 | -0.18890200 |
| C | 7.958452000  | 1.318598000  | -0.34630100 |
| C | 6.731930000  | 0.689154000  | -0.33299700 |
| H | 6.750337000  | -0.403273000 | -0.27073700 |
| C | 5.448491000  | 1.277073000  | -0.38087400 |
| H | 5.375156000  | 2.364654000  | -0.43460700 |
| C | 4.279525000  | 0.548236000  | -0.35460900 |

|   |               |              |              |   |               |              |              |
|---|---------------|--------------|--------------|---|---------------|--------------|--------------|
| H | 4.391707000   | -0.476762000 | -0.475860000 | H | 4.367344000   | -0.541070000 | -0.304022000 |
| C | 8.176831000   | 2.810881000  | -0.383984000 | C | 8.106779000   | 2.806219000  | -0.430874000 |
| H | 8.676889000   | 3.172725000  | 0.525253000  | H | 8.615057000   | 3.204991000  | 0.458300000  |
| H | 8.810834000   | 3.114880000  | -1.227469000 | H | 8.721455000   | 3.094721000  | -1.293822000 |
| H | 7.228956000   | 3.347438000  | -0.473889000 | H | 7.148457000   | 3.323922000  | -0.520829000 |
| C | 3.005893000   | 1.163441000  | -0.511327000 | C | 2.965465000   | 1.074738000  | -0.380444000 |
| C | 1.930002000   | 0.301210000  | -0.538758000 | C | 1.889510000   | 0.192010000  | -0.347368000 |
| H | 2.166613000   | -0.767006000 | -0.550405000 | H | 2.144587000   | -0.871594000 | -0.310850000 |
| C | 0.554422000   | 0.622776000  | -0.544415000 | C | 0.524314000   | 0.494239000  | -0.351870000 |
| H | 0.258627000   | 1.674027000  | -0.516512000 | H | 0.211431000   | 1.540596000  | -0.380620000 |
| C | -0.448750000  | -0.314987000 | -0.575095000 | C | -0.482550000  | -0.464839000 | -0.316717000 |
| H | -0.150708000  | -1.365432000 | -0.608890000 | H | -0.168422000  | -1.511027000 | -0.291079000 |
| C | 2.851610000   | 2.653842000  | -0.502009000 | C | 2.782760000   | 2.561389000  | -0.441055000 |
| H | 3.307503000   | 3.093358000  | 0.395322000  | H | 3.275857000   | 3.057165000  | 0.405550000  |
| H | 3.358059000   | 3.109456000  | -1.363393000 | H | 3.232187000   | 2.979072000  | -1.352042000 |
| H | 1.807123000   | 2.973335000  | -0.530247000 | H | 1.732177000   | 2.861336000  | -0.428553000 |
| C | -1.825535000  | 0.000783000  | -0.555484000 | C | -1.842848000  | -0.163535000 | -0.309314000 |
| H | -2.067546000  | 1.066480000  | -0.501402000 | H | -2.100290000  | 0.899852000  | -0.329357000 |
| C | -2.896289000  | -0.867763000 | -0.587325000 | C | -2.927760000  | -1.051432000 | -0.273919000 |
| C | -4.217373000  | -0.332280000 | -0.527705000 | C | -4.225129000  | -0.527594000 | -0.255812000 |
| H | -4.295872000  | 0.755957000  | -0.449079000 | H | -4.318091000  | 0.562193000  | -0.270590000 |
| C | -5.381471000  | -1.053176000 | -0.546857000 | C | -5.413373000  | -1.264389000 | -0.214194000 |
| H | -5.313564000  | -2.139088000 | -0.629933000 | H | -5.333162000  | -2.352924000 | -0.199668000 |
| C | -2.731845000  | -2.354639000 | -0.676384000 | C | -2.734590000  | -2.539850000 | -0.247355000 |
| H | -1.685068000  | -2.667213000 | -0.688748000 | H | -1.682903000  | -2.832093000 | -0.297828000 |
| H | -3.216749000  | -2.858438000 | 0.170186000  | H | -3.152053000  | -2.978699000 | 0.668428000  |
| H | -3.203582000  | -2.750073000 | -1.586024000 | H | -3.247451000  | -3.022975000 | -1.088996000 |
| C | -6.669380000  | -0.465666000 | -0.447985000 | C | -6.670171000  | -0.682877000 | -0.182983000 |
| H | -6.685107000  | 0.623710000  | -0.346007000 | H | -6.696800000  | 0.411304000  | -0.189594000 |
| C | -7.888918000  | -1.096510000 | -0.448078000 | C | -7.931471000  | -1.320130000 | -0.135686000 |
| C | -9.075711000  | -0.299768000 | -0.287541000 | C | -9.069981000  | -0.526259000 | -0.085965000 |
| H | -8.911850000  | 0.773070000  | -0.166724000 | H | -8.904293000  | 0.549867000  | -0.084095000 |
| C | -10.345343000 | -0.776801000 | -0.214471000 | C | -10.395757000 | -1.008010000 | 0.033455000  |
| H | -10.469331000 | -1.862430000 | -0.248093000 | H | -10.481668000 | -2.086595000 | 0.159643000  |
| C | -8.038776000  | -2.580022000 | -0.585812000 | C | -8.048894000  | -2.817587000 | -0.128429000 |
| H | -7.083217000  | -3.092732000 | -0.721050000 | H | -7.087278000  | -3.315109000 | -0.277926000 |
| H | -8.523820000  | -3.012852000 | 0.300378000  | H | -8.459926000  | -3.183478000 | 0.822123000  |
| H | -8.675709000  | -2.836038000 | -1.442838000 | H | -8.722884000  | -3.170042000 | -0.918923000 |
| C | -11.564504000 | -0.017788000 | 0.027437000  | C | -11.573207000 | -0.292882000 | 0.080209000  |
| C | -12.579777000 | -0.740699000 | 0.922810000  | C | -12.890344000 | -0.997581000 | 0.424115000  |
| C | -13.041069000 | 1.992234000  | -0.179631000 | C | -12.786275000 | 1.809554000  | 0.186443000  |
| C | -13.682138000 | 0.207517000  | 1.426122000  | C | -13.585289000 | -0.163572000 | 1.513485000  |
| C | -14.198665000 | 1.177136000  | 0.370867000  | C | -13.819261000 | 1.288807000  | 1.133197000  |
| H | -14.521780000 | -0.417597000 | 1.783414000  | H | -14.550608000 | -0.612687000 | 1.786819000  |
| C | -13.218727000 | -1.898303000 | 0.137799000  | C | -13.777505000 | -1.087721000 | -0.829176000 |
| H | -12.457025000 | -2.630421000 | -0.157542000 | H | -13.335293000 | -1.764672000 | -1.570122000 |
| H | -13.946590000 | -2.428249000 | 0.766981000  | H | -14.774179000 | -1.477560000 | -0.577014000 |
| H | -13.733984000 | -1.547707000 | -0.758397000 | H | -13.892295000 | -0.114402000 | -1.323225000 |
| C | -11.882298000 | -1.338634000 | 2.154921000  | C | -12.714276000 | -2.410445000 | 0.973903000  |
| H | -11.207994000 | -2.152641000 | 1.863590000  | H | -12.313838000 | -3.100709000 | 0.221964000  |
| H | -11.303404000 | -0.588798000 | 2.700308000  | H | -12.044712000 | -2.429654000 | 1.842449000  |
| H | -12.627751000 | -1.755394000 | 2.844715000  | H | -13.686608000 | -2.809052000 | 1.290547000  |
| C | -11.812150000 | 1.199105000  | -0.522581000 | C | -11.694936000 | 1.120240000  | -0.244475000 |
| H | -12.771550000 | 2.760566000  | 0.563530000  | C | -10.731020000 | 1.827815000  | -1.154391000 |
| C | -10.899034000 | 1.890545000  | -1.487407000 | H | -9.939723000  | 2.358165000  | -0.607343000 |
| H | -10.291096000 | 2.667494000  | -0.998712000 | H | -10.241772000 | 1.128764000  | -1.840289000 |
| H | -10.206902000 | 1.204002000  | -1.984082000 | H | -11.260384000 | 2.585925000  | -1.741088000 |
| H | -11.483033000 | 2.408922000  | -2.261044000 | H | 10.549134000  | 2.064161000  | -0.195434000 |
| H | -13.380783000 | 2.558357000  | -1.063052000 | O | -15.127221000 | 1.569350000  | 0.597847000  |
| H | 10.599155000  | 2.025882000  | -0.112145000 | H | -15.232981000 | 1.017803000  | -0.193304000 |

|   |               |              |             |   |               |              |             |
|---|---------------|--------------|-------------|---|---------------|--------------|-------------|
| O | -14.880530000 | 0.434710000  | -0.62519900 | H | -13.806253000 | 1.910791000  | 2.04066100  |
| H | -15.092202000 | 1.043744000  | -1.34544100 | O | 13.815135000  | -1.914198000 | -1.47187500 |
| H | -14.912002000 | 1.866107000  | 0.86923600  | H | 14.416416000  | -2.667997000 | -1.38812800 |
| O | 13.852696000  | -1.980172000 | -1.35798000 | H | 12.597308000  | -2.937757000 | -0.12518000 |
| H | 14.434118000  | -2.748714000 | -1.26880500 | H | -12.958904000 | -0.195635000 | 2.41632900  |
| H | 12.572714000  | -3.002310000 | -0.06935700 | O | -13.005045000 | 3.091781000  | -0.21162800 |
| O | -13.145399000 | 0.976857000  | 2.49732800  | H | -13.938290000 | 3.274806000  | 0.00511100  |
| H | -13.867200000 | 1.516198000  | 2.84933200  |   |               |              |             |

### VI

E(scf) = -1857.27296088a.u.

|   |              |              |             |
|---|--------------|--------------|-------------|
| C | 14.173573000 | -0.039620000 | 0.55000200  |
| C | 12.892842000 | 0.807157000  | 0.59799100  |
| C | 11.724443000 | 0.113583000  | -0.11453800 |
| C | 11.830013000 | -1.156325000 | -0.63533900 |
| C | 12.980186000 | -2.015705000 | -0.32920100 |
| C | 13.949243000 | -1.524029000 | 0.73526700  |
| H | 14.660651000 | 0.097717000  | -0.42865600 |
| H | 14.887388000 | 0.347334000  | 1.29501700  |
| C | 10.824273000 | -1.789585000 | -1.54472600 |
| H | 10.105742000 | -2.418163000 | -0.99988100 |
| H | 10.252924000 | -1.048546000 | -2.11294300 |
| H | 11.345830000 | -2.462936000 | -2.23222100 |
| C | 13.226772000 | 2.137978000  | -0.09647300 |
| H | 13.388377000 | 2.000420000  | -1.17294300 |
| H | 12.449260000 | 2.898297000  | 0.03763500  |
| H | 14.151386000 | 2.548686000  | 0.33046000  |
| C | 12.492853000 | 1.106236000  | 2.05124200  |
| H | 13.317174000 | 1.606266000  | 2.57849000  |
| H | 11.622588000 | 1.773860000  | 2.08849600  |
| H | 12.240703000 | 0.186934000  | 2.58702600  |
| H | 14.890296000 | -2.079241000 | 0.59307800  |
| O | 13.361624000 | -1.857599000 | 1.99064300  |
| H | 14.000187000 | -1.609309000 | 2.67470300  |
| C | 10.524488000 | 0.915214000  | -0.19699900 |
| C | 9.232239000  | 0.481099000  | -0.26217300 |
| H | 9.032916000  | -0.590283000 | -0.27648900 |
| C | 8.074733000  | 1.324799000  | -0.25071900 |
| C | 6.835793000  | 0.726420000  | -0.27698800 |
| H | 6.826058000  | -0.367040000 | -0.31326000 |
| C | 5.563015000  | 1.347862000  | -0.26158900 |
| H | 5.514251000  | 2.436773000  | -0.21432900 |
| C | 4.387125000  | 0.643996000  | -0.30105100 |
| H | 4.453463000  | -0.446659000 | -0.35155200 |
| C | 8.262450000  | 2.809575000  | -0.20435800 |
| H | 8.810526000  | 3.110869000  | 0.69910100  |
| H | 8.856006000  | 3.160687000  | -1.05880700 |
| H | 7.317055000  | 3.357607000  | -0.21267100 |
| C | 3.073664000  | 1.195767000  | -0.28091800 |
| C | 1.997227000  | 0.333851000  | -0.33304000 |
| H | 2.234337000  | -0.732592000 | -0.39276800 |
| C | 0.622317000  | 0.653797000  | -0.31679300 |
| H | 0.323746000  | 1.702352000  | -0.24930700 |
| C | -0.376307000 | -0.288131000 | -0.37996100 |
| H | -0.071241000 | -1.334667000 | -0.45102100 |
| C | 2.920372000  | 2.684016000  | -0.20015900 |
| H | 3.376308000  | 3.079602000  | 0.71729300  |
| H | 3.425641000  | 3.180499000  | -1.03908200 |
| H | 1.875876000  | 3.004372000  | -0.21214100 |
| C | -1.754602000 | 0.016963000  | -0.35247400 |
| H | -2.006278000 | 1.078169000  | -0.26690400 |

### VII

E(scf) = -1856.67665269 a.u.

|   |              |              |             |
|---|--------------|--------------|-------------|
| C | 14.170726000 | 0.078747000  | 0.48800700  |
| C | 12.877594000 | 0.907082000  | 0.52890500  |
| C | 11.710438000 | 0.174818000  | -0.14733800 |
| C | 11.832414000 | -1.108948000 | -0.63423100 |
| C | 12.997437000 | -1.941036000 | -0.31604400 |
| C | 13.971668000 | -1.402808000 | 0.72093800  |
| H | 14.642505000 | 0.193750000  | -0.50092000 |
| H | 14.888358000 | 0.498962000  | 1.21117700  |
| C | 10.829674000 | -1.781458000 | -1.51839700 |
| H | 10.126849000 | -2.408956000 | -0.95222500 |
| H | 10.240759000 | -1.064403000 | -2.09921000 |
| H | 11.357174000 | -2.462348000 | -2.19393800 |
| C | 13.180417000 | 2.222023000  | -0.20809400 |
| H | 13.331937000 | 2.055443000  | -1.28191300 |
| H | 12.391438000 | 2.972662000  | -0.08697900 |
| H | 14.102627000 | 2.660504000  | 0.19574000  |
| C | 12.493392000 | 1.241159000  | 1.97873400  |
| H | 13.315662000 | 1.771711000  | 2.47876000  |
| H | 11.611088000 | 1.892940000  | 2.00984600  |
| H | 12.266844000 | 0.333011000  | 2.54433000  |
| H | 14.919786000 | -1.947448000 | 0.58398000  |
| O | 13.405383000 | -1.706756000 | 1.99364900  |
| H | 14.042847000 | -1.415066000 | 2.66135000  |
| C | 10.497771000 | 0.951359000  | -0.23886800 |
| C | 9.209938000  | 0.491058000  | -0.28435900 |
| H | 9.032451000  | -0.584059000 | -0.26410500 |
| C | 8.040632000  | 1.309926000  | -0.29437500 |
| C | 6.807097000  | 0.685966000  | -0.28448700 |
| H | 6.820621000  | -0.408144000 | -0.27505700 |
| C | 5.529936000  | 1.281169000  | -0.28295800 |
| H | 5.459541000  | 2.370131000  | -0.28837100 |
| C | 4.357797000  | 0.552769000  | -0.27226700 |
| H | 4.444739000  | -0.537661000 | -0.26793400 |
| C | 8.196334000  | 2.799271000  | -0.30733800 |
| H | 8.731601000  | 3.148992000  | 0.58637500  |
| H | 8.787593000  | 3.128750000  | -1.17182800 |
| H | 7.239276000  | 3.325718000  | -0.34281000 |
| C | 3.047188000  | 1.081832000  | -0.26429900 |
| C | 1.970266000  | 0.197167000  | -0.25405200 |
| H | 2.225739000  | -0.866800000 | -0.25576100 |
| C | 0.606821000  | 0.499658000  | -0.24080600 |
| H | 0.293317000  | 1.546076000  | -0.23573700 |
| C | -0.399593000 | -0.461976000 | -0.23237900 |
| H | -0.084404000 | -1.507973000 | -0.24010200 |
| C | 2.864650000  | 2.569680000  | -0.26622400 |
| H | 3.341519000  | 3.029315000  | 0.60964400  |
| H | 3.330038000  | 3.025223000  | -1.15038200 |
| H | 1.813916000  | 2.868994000  | -0.26033400 |
| C | -1.758843000 | -0.161775000 | -0.21360500 |
| H | -2.017544000 | 0.901341000  | -0.20331500 |

|   |               |              |              |   |               |              |              |
|---|---------------|--------------|--------------|---|---------------|--------------|--------------|
| C | -2.816481000  | -0.861640000 | -0.414950000 | C | -2.843053000  | -1.052436000 | -0.204937000 |
| C | -4.142939000  | -0.340595000 | -0.350278000 | C | -4.139791000  | -0.529272000 | -0.179880000 |
| H | -4.233868000  | 0.744484000  | -0.247686000 | H | -4.233196000  | 0.560422000  | -0.166183000 |
| C | -5.297989000  | -1.074910000 | -0.394794000 | C | -5.328287000  | -1.267440000 | -0.168211000 |
| H | -5.216094000  | -2.157873000 | -0.499461000 | H | -5.248447000  | -2.355888000 | -0.181854000 |
| C | -2.636158000  | -2.343581000 | -0.544871000 | C | -2.648465000  | -2.540585000 | -0.224260000 |
| H | -1.586661000  | -2.646219000 | -0.556849000 | H | -1.595352000  | -2.831332000 | -0.214224000 |
| H | -3.122690000  | -2.875258000 | 0.283251000  | H | -3.125964000  | -3.016044000 | 0.642111000  |
| H | -3.096513000  | -2.717205000 | -1.469191000 | H | -3.101556000  | -2.988726000 | -1.118236000 |
| C | -6.594450000  | -0.506540000 | -0.299474000 | C | -6.584333000  | -0.685576000 | -0.136277000 |
| H | -6.628447000  | 0.580897000  | -0.184476000 | H | -6.610223000  | 0.408467000  | -0.120249000 |
| C | -7.803124000  | -1.157878000 | -0.321577000 | C | -7.846502000  | -1.322905000 | -0.116732000 |
| C | -9.005255000  | -0.380700000 | -0.175416000 | C | -8.983986000  | -0.527723000 | -0.070923000 |
| H | -8.862104000  | 0.694461000  | -0.052946000 | H | -8.817313000  | 0.548151000  | -0.051289000 |
| C | -10.265414000 | -0.883578000 | -0.121758000 | C | -10.311938000 | -1.008696000 | 0.023033000  |
| H | -10.367256000 | -1.971235000 | -0.153779000 | H | -10.402374000 | -2.087960000 | 0.139256000  |
| C | -7.927074000  | -2.641911000 | -0.476426000 | C | -7.966600000  | -2.819845000 | -0.136556000 |
| H | -6.962476000  | -3.138626000 | -0.605348000 | H | -7.002453000  | -3.317525000 | -0.267601000 |
| H | -8.415319000  | -3.092212000 | 0.399129000  | H | -8.403546000  | -3.199352000 | 0.796847000  |
| H | -8.549744000  | -2.898375000 | -1.343554000 | H | -8.619973000  | -3.157909000 | -0.950267000 |
| C | -11.508042000 | -0.153620000 | 0.094578000  | C | -11.487190000 | -0.289145000 | 0.057080000  |
| C | -12.509206000 | -0.888258000 | 0.994659000  | C | -12.811389000 | -0.990062000 | 0.380899000  |
| C | -13.043714000 | 1.804516000  | -0.194492000 | C | -12.693158000 | 1.816921000  | 0.151496000  |
| C | -13.652605000 | 0.037934000  | 1.431710000  | C | -13.516796000 | -0.156374000 | 1.463717000  |
| C | -14.180184000 | 0.940389000  | 0.344740000  | C | -13.739488000 | 1.298360000  | 1.085216000  |
| C | -13.058346000 | -2.127154000 | 0.269228000  | C | -13.682250000 | -1.072372000 | -0.884191000 |
| H | -12.263258000 | -2.851697000 | 0.051302000  | H | -13.232023000 | -1.746361000 | -1.622979000 |
| H | -13.791333000 | -2.638503000 | 0.907428000  | H | -14.682244000 | -1.462183000 | -0.646067000 |
| H | -13.554515000 | -1.857239000 | -0.665552000 | H | -13.789927000 | -0.096558000 | -1.374890000 |
| C | -11.803016000 | -1.355361000 | 2.275994000  | C | -12.647453000 | -2.405317000 | 0.928282000  |
| H | -11.024224000 | -2.099125000 | 2.068473000  | H | -12.240732000 | -3.094804000 | 0.179032000  |
| H | -11.330588000 | -0.515577000 | 2.800795000  | H | -11.988980000 | -2.430155000 | 1.805095000  |
| H | -12.528664000 | -1.816987000 | 2.958907000  | H | -13.625061000 | -2.801152000 | 1.231578000  |
| C | -11.769513000 | 1.054374000  | -0.468752000 | C | -11.598059000 | 1.124638000  | -0.266064000 |
| C | -10.838205000 | 1.788027000  | -1.383131000 | C | -10.619876000 | 1.829728000  | -1.162715000 |
| H | -10.252006000 | 2.544452000  | -0.842185000 | H | -9.839260000  | 2.364664000  | -0.604939000 |
| H | -10.132036000 | 1.124940000  | -1.892672000 | H | -10.117987000 | 1.128220000  | -1.836803000 |
| H | -11.406434000 | 2.337228000  | -2.146552000 | H | -11.140147000 | 2.583792000  | -1.762581000 |
| H | -13.384570000 | 2.256282000  | -1.151224000 | H | 10.621380000  | 2.032373000  | -0.162217000 |
| H | 10.668303000  | 1.991368000  | -0.093717000 | O | -15.039102000 | 1.588135000  | 0.536602000  |
| O | -14.761878000 | 0.147471000  | -0.677633000 | H | -15.142178000 | 1.037148000  | -0.255311000 |
| H | -15.005048000 | 0.739260000  | -1.403602000 | H | -13.732076000 | 1.917537000  | 1.994588000  |
| H | -14.943526000 | 1.618341000  | 0.779209000  | O | 13.176771000  | -3.046744000 | -0.818316000 |
| O | 13.148233000  | -3.107946000 | -0.862519000 | H | -12.902873000 | -0.194221000 | 2.374777000  |
| H | -13.289391000 | 0.701028000  | 2.230021000  | H | -14.487482000 | -0.602152000 | 1.722740000  |
| H | -14.468214000 | -0.562930000 | 1.857034000  | O | -12.901983000 | 3.098743000  | -0.248717000 |
| O | -12.708430000 | 2.847021000  | 0.723367000  | H | -13.835681000 | 3.288358000  | -0.038977000 |
| H | -13.480870000 | 3.427150000  | 0.794094000  |   |               |              |              |

### 3

E(scf) = -1856.09491320 a.u.

|   |              |              |              |
|---|--------------|--------------|--------------|
| C | 14.123510000 | -0.154434000 | 0.422137000  |
| C | 12.854326000 | 0.665913000  | 0.694623000  |
| C | 11.672710000 | 0.179670000  | -0.152127000 |
| C | 11.742616000 | -0.942142000 | -0.944839000 |
| C | 12.884337000 | -1.863374000 | -0.868540000 |
| C | 13.888000000 | -1.639808000 | 0.253011000  |
| H | 14.593679000 | 0.210184000  | -0.504888000 |
| H | 14.855110000 | 0.038595000  | 1.223334000  |
| C | 10.715295000 | -1.337316000 | -1.959242000 |
| H | 10.014556000 | -2.089334000 | -1.570589000 |

### III

E(scf) = -1782.65811824 a.u.

|   |              |              |              |
|---|--------------|--------------|--------------|
| C | 13.482304000 | 0.279479000  | -1.018788000 |
| C | 12.658004000 | 0.890954000  | 0.124640000  |
| C | 11.304790000 | 0.170566000  | 0.145215000  |
| C | 11.376745000 | -1.281159000 | 0.175115000  |
| C | 12.515801000 | -1.899770000 | -0.237216000 |
| C | 13.655988000 | -1.227927000 | -0.925084000 |
| H | 12.983438000 | 0.517010000  | -1.969926000 |
| H | 14.474832000 | 0.753474000  | -1.061242000 |
| C | 10.296122000 | -2.134068000 | 0.775694000  |
| H | 9.732752000  | -1.586123000 | 1.537798000  |

|   |               |              |             |   |               |              |             |
|---|---------------|--------------|-------------|---|---------------|--------------|-------------|
| H | 10.126603000  | -0.484067000 | -2.3093100  | H | 9.574282000   | -2.494114000 | 0.02985300  |
| H | 11.220430000  | -1.813776000 | -2.80546400 | H | 10.736368000  | -3.025071000 | 1.23497700  |
| C | 13.198264000  | 2.124710000  | 0.35053300  | C | 12.554407000  | 2.391071000  | -0.13970800 |
| H | 13.341790000  | 2.262591000  | -0.72851100 | H | 11.988281000  | 2.610161000  | -1.05377200 |
| H | 12.435190000  | 2.834897000  | 0.68840100  | H | 12.076787000  | 2.924423000  | 0.69077500  |
| H | 14.135230000  | 2.403141000  | 0.85037500  | H | 13.559754000  | 2.815846000  | -0.25592200 |
| C | 12.465042000  | 0.599873000  | 2.17979900  | C | 13.381574000  | 0.690063000  | 1.46553800  |
| H | 13.294855000  | 0.953857000  | 2.80708300  | H | 14.367534000  | 1.174042000  | 1.44474900  |
| H | 11.598045000  | 1.240953000  | 2.38410500  | H | 12.803385000  | 1.136979000  | 2.28378700  |
| H | 12.213193000  | -0.422000000 | 2.47656700  | H | 13.537356000  | -0.368623000 | 1.69383100  |
| H | 14.819262000  | -2.148437000 | -0.04343000 | H | 13.728137000  | -1.648380000 | -1.94654700 |
| O | 13.329844000  | -2.263136000 | 1.40728500  | O | 14.825493000  | -1.649949000 | -0.19773200 |
| H | 13.980856000  | -2.174340000 | 2.11818700  | H | 15.598068000  | -1.420096000 | -0.73247200 |
| C | 10.486353000  | 1.004896000  | -0.06275500 | C | 10.137009000  | 0.900792000  | 0.21302100  |
| C | 9.193334000   | 0.583451000  | -0.15295200 | C | 8.795987000   | 0.464337000  | 0.09669000  |
| H | 8.998305000   | -0.479323000 | -0.30100100 | H | 8.600773000   | -0.582547000 | -0.12942300 |
| C | 8.031905000   | 1.413586000  | -0.02430500 | C | 7.679811000   | 1.286290000  | 0.19793600  |
| C | 6.797480000   | 0.810152000  | -0.08779700 | C | 6.401106000   | 0.707934000  | 0.03222900  |
| H | 6.795055000   | -0.275983000 | -0.21865700 | H | 6.394314000   | -0.366677000 | -0.17579400 |
| C | 5.519919000   | 1.418040000  | -0.01257200 | C | 5.162043000   | 1.323726000  | 0.11105700  |
| H | 5.462273000   | 2.502170000  | 0.09663800  | H | 5.116732000   | 2.394045000  | 0.31987400  |
| C | 4.351468000   | 0.704451000  | -0.07641300 | C | 3.951871000   | 0.643117000  | -0.05385700 |
| H | 4.429110000   | -0.381829000 | -0.17679600 | H | 4.011172000   | -0.430792000 | -0.25378400 |
| C | 8.213021000   | 2.887234000  | 0.16655000  | C | 7.841237000   | 2.751275000  | 0.48911300  |
| H | 8.775805000   | 3.100639000  | 1.08572300  | H | 8.296199000   | 2.918199000  | 1.47408700  |
| H | 8.788157000   | 3.326915000  | -0.65882500 | H | 8.498247000   | 3.234202000  | -0.24574100 |
| H | 7.264429000   | 3.425934000  | 0.23256700  | H | 6.891057000   | 3.291174000  | 0.47446700  |
| C | 3.031863000   | 1.240134000  | -0.02569100 | C | 2.669890000   | 1.200306000  | 0.02032300  |
| C | 1.966368000   | 0.365089000  | -0.08452500 | C | 1.560642000   | 0.360468000  | -0.15142800 |
| H | 2.216161000   | -0.697285000 | -0.15990100 | H | 1.787765000   | -0.693675000 | -0.33841500 |
| C | 0.588121000   | 0.668472000  | -0.05804300 | C | 0.208257000   | 0.695621000  | -0.10719700 |
| H | 0.277376000   | 1.713831000  | 0.00359000  | H | -0.078340000  | 1.734273000  | 0.07468300  |
| C | -0.399214000  | -0.286421000 | -0.10676500 | C | -0.820276000  | -0.225118000 | -0.27386700 |
| H | -0.082868000  | -1.330249000 | -0.16354100 | H | -0.529262000  | -1.263354000 | -0.44995100 |
| C | 2.861477000   | 2.723851000  | 0.09094400  | C | 2.517540000   | 2.669503000  | 0.28803500  |
| H | 3.309622000   | 3.101219000  | 1.01974800  | H | 2.940454000   | 2.943245000  | 1.26359600  |
| H | 3.364646000   | 3.245511000  | -0.73350600 | H | 3.048284000   | 3.267684000  | -0.46385200 |
| H | 1.813754000   | 3.033378000  | 0.08391500  | H | 1.473914000   | 2.993540000  | 0.28337900  |
| C | -1.779868000  | 0.005576000  | -0.08573500 | C | -2.180239000  | 0.098849000  | -0.22400500 |
| H | -2.042202000  | 1.066407000  | -0.03667800 | H | -2.417014000  | 1.153432000  | -0.05176300 |
| C | -2.833338000  | -0.885565000 | -0.11997900 | C | -3.269128000  | -0.757351100 | -0.35879200 |
| C | -4.162318000  | -0.371530000 | -0.09349400 | C | -4.577503000  | -0.221531000 | -0.27058400 |
| H | -4.261928000  | 0.716837000  | -0.05132400 | H | -4.65345700   | 0.857936000  | -0.10907100 |
| C | -5.313638000  | -1.115446000 | -0.11417400 | C | -5.751630000  | -0.935419000 | -0.36257700 |
| H | -5.226485000  | -2.202145000 | -0.15365500 | H | -5.683403000  | -2.013441000 | -0.51717400 |
| C | -2.640741000  | -2.370059000 | -0.18418300 | C | -3.106162000  | -2.230124000 | -0.58802000 |
| H | -1.588982000  | -2.664677000 | -0.17682300 | H | -2.059421000  | -2.541375000 | -0.62100200 |
| H | -3.126565000  | -2.868640000 | 0.66476800  | H | -3.595365000  | -2.810651000 | 0.20542100  |
| H | -3.093363000  | -2.788163000 | -1.09307000 | H | -3.571460000  | -2.539517000 | -1.53341800 |
| C | -6.609907000  | -0.545273000 | -0.08379500 | C | -7.035569000  | -0.354215000 | -0.25922000 |
| H | -6.647325000  | 0.547639000  | -0.05209600 | H | -7.056908000  | 0.730271000  | -0.11296100 |
| C | -7.820206000  | -1.199765000 | -0.08780500 | C | -8.258429000  | -0.987512000 | -0.31286800 |
| C | -9.017214000  | -0.412505000 | -0.05266500 | C | -9.450956000  | -0.201357000 | -0.17018500 |
| H | -8.872879000  | 0.668244000  | -0.02724300 | H | -9.299208000  | 0.871974000  | -0.03656400 |
| C | -10.285011000 | -0.912138000 | 0.01580100  | C | -10.720081000 | -0.691283000 | -0.13961600 |
| H | -10.383826000 | -1.996295000 | 0.08549300  | H | -10.828952000 | -1.778194000 | -0.17742000 |
| C | -7.941644000  | -2.691694000 | -0.12266800 | C | -8.397175000  | -2.467169000 | -0.49916300 |
| H | -6.974354000  | -3.195814000 | -0.18554500 | H | -7.436330000  | -2.971341000 | -0.62797100 |
| H | -8.451004000  | -3.068004000 | 0.77520500  | H | -8.897378000  | -2.930150000 | 0.36324100  |
| H | -8.542110000  | -3.019633000 | -0.98112800 | H | -9.014737000  | -2.701362000 | -1.37634300 |

|   |               |              |             |   |               |              |             |
|---|---------------|--------------|-------------|---|---------------|--------------|-------------|
| C | -11.523398000 | -0.177136000 | 0.09191300  | C | -11.960955000 | 0.045180000  | 0.05229900  |
| C | -12.698584000 | -0.890599000 | 0.77954500  | C | -12.995608000 | -0.691931000 | 0.91433500  |
| C | -13.070587000 | 1.616281000  | -0.51416700 | C | -13.483774000 | 2.014842000  | -0.25484800 |
| C | -13.550855000 | 0.155706000  | 1.50643600  | C | -14.153803000 | 0.231193000  | 1.32472600  |
| C | -14.023232000 | 1.293679000  | 0.62771000  | C | -14.643437000 | 1.165411000  | 0.24164400  |
| C | -13.529481000 | -1.621492000 | -0.28394500 | H | -14.988610000 | -0.379657000 | 1.69588900  |
| H | -12.914794000 | -2.346050000 | -0.83485700 | H | -13.828347000 | 0.860013000  | 2.16765700  |
| H | -14.355353000 | -2.168896000 | 0.18880100  | C | -13.529999000 | 1.916386000  | 0.15412200  |
| H | -13.968278000 | -0.924853000 | -1.00612800 | H | -12.731114000 | -2.638369000 | -0.05794500 |
| C | -12.237674000 | -1.905196000 | 1.83082000  | H | -14.280582000 | -2.437906000 | 0.76343100  |
| H | -11.782007000 | -2.799599000 | 1.38994100  | H | -14.001776000 | -1.626160000 | -0.78731500 |
| H | -11.514941000 | -1.468580000 | 2.53163700  | C | -12.338455000 | -1.182018000 | 2.21263200  |
| H | -13.103344000 | -2.245902000 | 2.41262700  | H | -11.559748000 | -1.930302000 | 2.02257500  |
| C | -11.728412000 | 1.033459000  | -0.53250600 | H | -11.874654000 | -0.353966000 | 2.76390500  |
| C | -10.748363000 | 1.718025000  | -1.43139600 | H | -13.090565000 | -1.644427000 | 2.86624100  |
| H | -10.097464000 | 2.415572000  | -0.88597500 | C | -12.208360000 | 1.259164000  | -0.50820700 |
| H | -10.094425000 | 1.007048000  | -1.94926800 | H | -13.293466000 | 2.821597000  | 0.47532200  |
| H | -11.299323000 | 2.307311000  | -2.17096600 | C | -11.260616000 | 1.968735000  | -1.42605000 |
| H | 10.647301000  | 2.054917000  | 0.18672900  | H | -10.686841000 | 2.752275000  | -0.90728200 |
| O | -15.301866000 | 1.009662000  | 0.09346400  | H | -10.535566000 | 1.294490000  | -1.89194400 |
| H | -15.383636000 | 1.615923000  | -0.66504700 | H | -11.814731000 | 2.481949000  | -2.22452200 |
| H | -14.0718300   | 2.220253000  | 1.23442300  | H | -13.783752000 | 2.546270000  | -1.17397300 |
| O | 13.018693000  | -2.806585000 | -1.64076900 | H | 10.255096000  | 1.976844000  | 0.33105400  |
| H | -12.954819000 | 0.565135000  | 2.33422200  | O | -15.214440000 | 0.378122000  | -0.79678300 |
| H | -14.429081000 | -0.324487000 | 1.95841100  | H | -15.447317000 | 0.978152000  | -1.51822600 |
| O | -13.488916000 | 2.367204000  | -1.39857200 | H | -15.417649000 | 1.831260000  | 0.66688600  |
|   |               |              |             | O | 12.675460000  | -3.242690000 | -0.09161700 |
|   |               |              |             | H | 13.635041000  | -3.399591000 | -0.15519900 |

#### IV

E(scf) = -1782.07233750 a.u.

|   |               |              |             |
|---|---------------|--------------|-------------|
| C | -13.867200000 | 0.016382000  | 0.52087300  |
| C | -12.581750000 | -0.823850000 | 0.56031900  |
| C | -11.413644000 | -0.111077000 | -0.13396400 |
| C | -11.525748000 | 1.165540000  | -0.63682700 |
| C | -12.682482000 | 2.012622000  | -0.32253700 |
| C | -13.651145000 | 1.498718000  | 0.73182900  |
| H | -14.349605000 | -0.107228000 | -0.46187400 |
| H | -14.581837000 | -0.386933000 | 1.25639600  |
| C | -10.520500000 | 1.818727000  | -1.53240500 |
| H | -9.808645000  | 2.444174000  | -0.97531700 |
| H | -9.941729000  | 1.089806000  | -2.10871600 |
| H | -11.043887000 | 2.498355000  | -2.21231700 |
| C | -12.903494000 | -2.143619000 | -0.16029800 |
| H | -13.061807000 | -1.986838000 | -1.23461900 |
| H | -12.121173000 | -2.900901000 | -0.03740600 |
| H | -13.826889000 | -2.568534000 | 0.25515600  |
| C | -12.188465000 | -1.146540000 | 2.01032300  |
| H | -13.011975000 | -1.662892000 | 2.52287600  |
| H | -11.313020000 | -1.807607000 | 2.04118600  |
| H | -11.947329000 | -0.235038000 | 2.56426200  |
| H | -14.594805000 | 2.051440000  | 0.59754600  |
| O | -13.067290000 | 1.813698000  | 1.99377500  |
| H | -13.703802000 | 1.546337000  | 2.67253800  |
| C | -10.207666000 | -0.902820000 | -0.22121900 |
| C | -8.917943000  | -0.459325000 | -0.27671300 |
| H | -8.725550000  | 0.613383000  | -0.27957400 |
| C | -7.755237000  | -1.295614000 | -0.26688000 |
| C | -6.519602000  | -0.689690000 | -0.28124200 |
| H | -6.515886000  | 0.403974000  | -0.31209800 |
| C | -5.244150000  | -1.304893000 | -0.25671400 |

#### V

E(scf) = -1781.45521977 a.u.

|   |               |              |             |
|---|---------------|--------------|-------------|
| C | -13.867603000 | 0.013867000  | 0.46475400  |
| C | -12.585190000 | -0.831427000 | 0.49388300  |
| C | -11.408891000 | -0.104801000 | -0.17243000 |
| C | -11.513368000 | 1.186496000  | -0.64150900 |
| C | -12.669867000 | 2.028384000  | -0.31414100 |
| C | -13.648970000 | 1.489452000  | 0.71776200  |
| H | -14.340923000 | -0.081665000 | -0.52544900 |
| H | -14.590511000 | -0.406757000 | 1.18229300  |
| C | -10.500750000 | 1.859119000  | -1.51400300 |
| H | -9.792073000  | 2.469943000  | -0.93702200 |
| H | -9.919059000  | 1.143396000  | -2.10356700 |
| H | -11.018336000 | 2.555757000  | -2.18104000 |
| C | -12.904674000 | -2.132265000 | -0.26090100 |
| H | -13.054781000 | -1.949323000 | -1.33226000 |
| H | -12.125054000 | -2.894224000 | -0.15047900 |
| H | -13.832005000 | -2.564623000 | 0.13760700  |
| C | -12.204941000 | -1.189750000 | 1.93901000  |
| H | -13.033313000 | -1.717490000 | 2.43177300  |
| H | -11.330414000 | -1.852320000 | 1.96119600  |
| H | -11.968093000 | -0.291986000 | 2.51680000  |
| H | -14.589991000 | 2.048369000  | 0.59087100  |
| O | -13.074481000 | 1.768760000  | 1.99237100  |
| H | -13.713472000 | 1.477379000  | 2.65876900  |
| C | -10.206014000 | -0.896111000 | -0.27496000 |
| C | -8.912248000  | -0.453362000 | -0.31089300 |
| H | -8.718364000  | 0.618444000  | -0.27388500 |
| C | -7.755234000  | -1.290544000 | -0.32988400 |
| C | -6.512395000  | -0.686800000 | -0.30383800 |
| H | -6.507342000  | 0.407024000  | -0.27704600 |
| C | -5.245335000  | -1.304471000 | -0.30348200 |

|   |               |              |             |   |               |              |             |
|---|---------------|--------------|-------------|---|---------------|--------------|-------------|
| H | -5.191704000  | -2.393502000 | -0.20722000 | H | -5.194476000  | -2.394163000 | -0.32605600 |
| C | -4.069791000  | -0.597686000 | -0.28719100 | C | -4.060871000  | -0.598182000 | -0.27194900 |
| H | -4.137750000  | 0.492631000  | -0.34241200 | H | -4.127352000  | 0.493418000  | -0.25089200 |
| C | -7.934182000  | -2.781885000 | -0.23376100 | C | -7.934684000  | -2.776800000 | -0.36692900 |
| H | -8.482435000  | -3.094589000 | 0.66570300  | H | -8.480509000  | -3.131151000 | 0.51846400  |
| H | -8.523914000  | -3.128582000 | -1.09264500 | H | -8.526260000  | -3.083279000 | -1.23953300 |
| H | -6.985644000  | -3.324390000 | -0.24559600 | H | -6.986219000  | -3.318167000 | -0.40530500 |
| C | -2.756145000  | -1.147709000 | -0.24945800 | C | -2.759915000  | -1.152492000 | -0.26129100 |
| C | -1.678409000  | -0.286786000 | -0.29774400 | C | -1.667489000  | -0.288502000 | -0.22912200 |
| H | -1.913126000  | 0.779062000  | -0.37514200 | H | -1.902565000  | 0.780079000  | -0.21835300 |
| C | -0.304993000  | -0.610142000 | -0.25665500 | C | -0.309698000  | -0.617707000 | -0.20810700 |
| H | -0.012348000  | -1.658150000 | -0.15999900 | H | -0.016548000  | -1.669925000 | -0.21288000 |
| C | 0.701538000   | 0.322936000  | -0.32964600 | C | 0.714371000   | 0.323674000  | -0.18017500 |
| H | 0.408100000   | 1.370035000  | -0.43494800 | H | 0.420054000   | 1.375651000  | -0.17951000 |
| C | -2.603780000  | -2.635456000 | -0.15531100 | C | -2.604838000  | -2.643202000 | -0.28619600 |
| H | -3.066968000  | -3.024209000 | 0.76141000  | H | -3.107066000  | -3.109559000 | 0.57156500  |
| H | -3.102614000  | -3.137961000 | -0.99451500 | H | -3.060843000  | -3.073751000 | -1.18760500 |
| H | -1.559494000  | -2.956494000 | -0.15770600 | H | -1.559999000  | -2.961767000 | -0.26554000 |
| C | 2.075554000   | 0.003355000  | -0.27339500 | C | 2.067771000   | -0.004165000 | -0.15376000 |
| H | 2.311563000   | -1.057281000 | -0.14531300 | H | 2.304953000   | -1.072325000 | -0.15067000 |
| C | 3.151262000   | 0.863375000  | -0.35757500 | C | 3.168606000   | 0.864566000  | -0.13105200 |
| C | 4.467435000   | 0.323702000  | -0.25783300 | C | 4.454867000   | 0.314355000  | -0.10116800 |
| H | 4.536759000   | -0.756354000 | -0.09893000 | H | 4.526057000   | -0.776995000 | -0.09167900 |
| C | 5.638785000   | 1.029054000  | -0.33794700 | C | 5.656920000   | 1.028839000  | -0.08297200 |
| H | 5.583383000   | 2.105781000  | -0.50689500 | H | 5.597803000   | 2.118346000  | -0.09794300 |
| C | 2.995107000   | 2.341172000  | -0.54961200 | C | 3.003804000   | 2.356318000  | -0.14032300 |
| H | 1.950164000   | 2.658786000  | -0.57674600 | H | 1.956524000   | 2.667314000  | -0.14354700 |
| H | 3.488808000   | 2.898539000  | 0.25707100  | H | 3.477307000   | 2.814441000  | 0.73747400  |
| H | 3.462685000   | 2.669232000  | -1.48753400 | H | 3.478944000   | 2.803248000  | -1.02325400 |
| C | 6.918957000   | 0.432970000  | -0.20522500 | C | 6.901887000   | 0.422693000  | -0.04778400 |
| H | 6.919882000   | -0.643959000 | -0.01137300 | H | 6.906192000   | -0.671602000 | -0.03035000 |
| C | 8.148648000   | 1.040197000  | -0.28323000 | C | 8.175646000   | 1.036535000  | -0.03219400 |
| C | 9.323504000   | 0.235278000  | -0.08352600 | C | 9.298013000   | 0.216932000  | 0.00678900  |
| H | 9.138359000   | -0.815185000 | 0.14876600  | H | 9.100934000   | -0.851344000 | 0.03402000  |
| C | 10.605688000  | 0.684769000  | -0.10750900 | C | 10.631096000  | 0.692159000  | 0.05466000  |
| H | 10.749799000  | 1.757606000  | -0.25994100 | H | 10.701542000  | 1.777342000  | 0.10378800  |
| C | 8.319025000   | 2.502551000  | -0.55498500 | C | 8.321993000   | 2.530993000  | -0.05950000 |
| H | 7.367717000   | 3.022811000  | -0.69119800 | H | 7.360057000   | 3.048254000  | -0.09348600 |
| H | 8.851989000   | 2.998189000  | 0.26817400  | H | 8.856262000   | 2.896150000  | 0.82705800  |
| H | 8.919864000   | 2.671011000  | -1.45846200 | H | 8.899769000   | 2.860192000  | -0.93217700 |
| C | 11.821907000  | -0.071156000 | 0.15431800  | C | 11.840433000  | 0.031525000  | 0.09467200  |
| C | 12.907142000  | 0.726833000  | 0.89152600  | C | 13.133662000  | 0.842006000  | 0.23344800  |
| C | 13.249987000  | -2.133259000 | 0.09386700  | C | 13.210208000  | -1.991401000 | 0.25739700  |
| C | 14.014159000  | -0.192122000 | 1.43138800  | C | 14.046440000  | 0.129626000  | 1.24592300  |
| C | 14.452609000  | -1.290721000 | 0.48990000  | C | 14.371986000  | -1.307008000 | 0.89249300  |
| C | 13.493372000  | 1.788365000  | -0.05272200 | C | 13.812016000  | 0.935909000  | -1.14343400 |
| H | 12.728227000  | 2.511391000  | -0.36348000 | H | 13.182083000  | 1.508403000  | -1.83677100 |
| H | 14.282234000  | 2.354667000  | 0.46027700  | H | 14.781014000  | 1.444816000  | -1.05965500 |
| H | 13.929811000  | 1.333516000  | -0.94465000 | H | 13.999274000  | -0.050635000 | -1.57599300 |
| C | 12.299852000  | 1.446234000  | 2.10459400  | C | 12.918993000  | 2.264622000  | 0.75130300  |
| H | 11.561241000  | 2.200831000  | 1.80809900  | H | 12.396685000  | 2.901284000  | 0.02677200  |
| H | 11.800566000  | 0.740873000  | 2.78124000  | H | 12.351250000  | 2.280003000  | 1.69067800  |
| H | 13.087006000  | 1.960065000  | 2.67255200  | H | 13.892452000  | 2.733952000  | 0.94040200  |
| C | 12.009267000  | -1.355947000 | -0.24933100 | C | 12.028994000  | -1.408011000 | -0.06573200 |
| C | 11.020566000  | -2.134716000 | -1.06239800 | C | 10.955443000  | -2.286206000 | -0.64565400 |
| H | 10.40018900   | -2.798491000 | -0.44061900 | H | 10.191304000  | -2.553016000 | 0.09575200  |
| H | 10.337864000  | -1.492729000 | -1.62743600 | H | 10.436820000  | -1.806919000 | -1.48391000 |
| H | 11.543380000  | -2.790052000 | -1.77247300 | H | 11.386965000  | -3.227164000 | -1.00464400 |
| H | 13.520924000  | -2.784327000 | -0.75396600 | H | -10.344266000 | -1.976434000 | -0.21617200 |
| H | -10.344198000 | -1.981015000 | -0.1303200  | O | 15.519179000  | -1.296233000 | 0.02955100  |

|   |               |              |             |   |               |              |             |
|---|---------------|--------------|-------------|---|---------------|--------------|-------------|
| O | 15.074889000  | -0.684703000 | -0.63670200 | H | 15.620034000  | -2.190433000 | -0.32615200 |
| H | 15.314555000  | -1.393384000 | -1.24929200 | H | 14.640999000  | -1.850296000 | 1.81856400  |
| H | 15.184150000  | -1.935345000 | 1.01141600  | O | -12.836657000 | 3.140725000  | -0.80502900 |
| O | -12.856508000 | 3.111239000  | -0.84070000 | H | 13.552619000  | 0.148041000  | 2.22844300  |
| H | 13.652609000  | -0.680002000 | 2.34925300  | H | 14.989496000  | 0.682499000  | 1.35124200  |
| H | 14.880684000  | 0.418037000  | 1.72210100  | H | 13.327081000  | -3.061615000 | 0.06188000  |
| H | 13.018661000  | -2.837029000 | 0.91321500  |   |               |              |             |
